# Supplementary material
Source: ML conference proceedings conference paper supplement (https://openreview.net/forum?id=ul5mlXrLZb)
Supplement: supplementary_material [file ORA_supp.pdf › supplementary_materials_ORA/ORA_supp.pdf]

---

# OOD Detection with Relative Angles

---

Anonymous Author(s)

Affiliation

Address

email

## Abstract

1 Deep learning systems deployed in real-world applications often encounter data that  
2 is different from their in-distribution (ID). A reliable model should ideally abstain  
3 from making decisions in this out-of-distribution (OOD) setting. Existing state-of-  
4 the-art methods primarily focus on feature distances, such as k-th nearest neighbors  
5 and distances to decision boundaries, either overlooking or ineffectively using in-  
6 distribution statistics. In this work, we propose a novel angle-based metric for OOD  
7 detection that is computed relative to the in-distribution structure. We demonstrate  
8 that the angles between feature representations and decision boundaries, viewed  
9 from the mean of in-distribution features, serve as an effective discriminative  
10 factor between ID and OOD data. We evaluate our method on nine ImageNet-  
11 pretrained models. Our approach achieves the lowest FPR in 5 out of 9 ImageNet  
12 models, obtains the best average FPR overall, and consistently ranking among  
13 the top 3 across all evaluated models. Furthermore, we highlight the benefits of  
14 contrastive representations by showing strong performance with ResNet SCL and  
15 CLIP architectures. Finally, we demonstrate that the scale-invariant nature of our  
16 score enables an ensemble strategy via simple score summation.

## 1 Introduction

18 A trustworthy deep learning system should not only produce accurate predictions, but also recognize  
19 when it is processing an unknown sample. The ability to identify when a sample deviates from the  
20 expected distribution, and potentially rejecting it, plays a crucial role especially in safety-critical  
21 applications, such as medical diagnosis [Fernando et al., 2021], driverless cars [Bogdoll et al., 2022]  
22 and surveillance systems [Diehl and Hampshire, 2002]. The out-of-distribution (OOD) detection  
23 problem addresses the challenge of distinguishing between in-distribution (ID) and OOD data –  
24 essentially, drawing a line between what the system knows and what it does not.

25 Various approaches have been proposed for OOD detection, mainly falling into two categories: (i)  
26 methods that suggest model regularization during training [Lee et al., 2018, Hendrycks et al., 2019,  
27 Meinke and Hein, 2020], and (ii) post-hoc methods, which leverage a pre-trained model to determine  
28 if a sample is OOD by designing appropriate *score functions* [Peng et al., 2024, Hendrycks and  
29 Gimpel, 2022, Sun et al., 2022]. Post-hoc methods are more advantageous for their efficiency and  
30 flexibility, as they can be applied to arbitrary pre-trained models without retraining. These approaches  
31 are often categorized based on the domain of their score functions, i.e., at which representational  
32 abstraction level they assess if a sample is OOD or not. Earlier techniques focus on measuring the  
33 model confidence in the logits space [Hendrycks and Gimpel, 2022, Liu et al., 2020], while the recent  
34 works employ distance-based scores [Sun et al., 2022, Schwag et al., 2021] defined in the model  
35 feature space. While logit-based methods suffer from the overconfident predictions of neural networks  
36 [Minderer et al., 2021, Lakshminarayanan et al., 2017, Guo et al., 2017], the recent success of distance-  
37 based techniques highlights that the relationships in the latent space can provide a richer analysis.

A natural approach to feature representations is by checking their proximity to the decision boundaries [Liu and Qin, 2024]. Conceptually, this can be related to identifying hard-to-learn examples in data-efficient learning [Joshi et al., 2024, Chen et al., 2023]. OOD samples can be viewed as hard-to-learn since they do not share the same label distribution as ID data. The success of this approach has been directly showed in fDBD score from Liu and Qin [2024]. However, our derivations revealed that the regularization term they use to incorporate ID statistics introduces an additional term that does not correlate with ID/OOD separation, ultimately hindering their performance.

In this work, we present OOD Detection with Relative Angles (ORA), a novel approach that exploits the relationship between feature representations and classifier decision boundaries, in the context of the mean statistics of ID features. Unlike the earlier techniques, ORA introduces a new angle-based measure that calculates the angles between the feature representations and their projection onto the decision boundaries, relative to the the mean statistics of ID features. Changing reference frame to the mean of ID features adds another layer of discriminatory information to the score, as it naturally incorporates the ID statistics to the distance notion, exploiting the disparity between ID and OOD statistics. Moreover, the scale-invariant nature of angle-based representations, as similarly observed in Moschella et al. [2023], allows us to aggregate the confidence scores from multiple pre-trained models simply by summing their ORA scores. This enables to have a score that can be single model based or extended to ensemble of models. In summary, our key contributions include:

- We present a novel post-hoc OOD score, which computes the angles between the feature representation and its projection to the decision boundaries, relative to the mean of ID-features
- We conduct an extensive evaluation on the ImageNet OOD benchmark using 9 model backbones, including modern transformer-based architectures and compare 10 detection methods. ORA achieves the best average FPR95 across all models, ranks in the top 3 for every model, and is the best-performing method on 5 out of 9 models.
- We analyze the benefits of using contrastively learned features with ORA. Our method achieves the best performance on CIFAR-10 with ResNet18-SCL and on ImageNet with ResNet50-SCL, reducing average FPR95 by 0.88% and 7.74% respectively. We further validate this trend with the CLIP model, where ORA achieves strong results in both zero-shot (25.85% FPR95) and linear probing (23.94% FPR95) settings.
- ORA’s scale-invariance allows aggregation of confidence scores from multiple pre-trained models, enabling an effective ensemble. Our experiments show that the ORA ensemble reduces the FPR95 by 2.51% on the ImageNet OOD benchmark compared to the best single model performance.

## 2 Related Work

Previous work in OOD detection falls into two categories: (i) methods that regularize models during training to produce different outcomes for ID and OOD data, and (ii) post-hoc methods that develop scoring mechanisms using pre-trained models on ID data.

**Model regularization.** Early methods addressing the OOD detection problem Bevandić et al. [2019], Hendrycks et al. [2019] utilize additional datasets to represent out-of-distribution data, training models with both positive and negative samples. This approach assumes a specific nature of OOD data, potentially limiting its effectiveness when encountering OOD samples that deviate from this assumption during inference. Malinin and Gales [2018] designed a network architecture to measure distributional uncertainty. In Geifman and El-Yaniv [2019]’s work, they provide another architecture with an additional reject option to abstain from answering. Ming et al. [2022], Du et al. [2022], focused on synthesizing outliers rather than relying on auxiliary datasets. On the other hand, Van Amersfoort et al. [2020], Wei et al. [2022] argued that overconfident predictions of the networks on OOD data are the problem to be mitigated. For example, Van Amersfoort et al. [2020] puts an additional gradient penalty to limit the confidence of the network. Whereas, Wei et al. [2022] tackled the same problem by enforcing a constant logit vector norm during training. Although it is natural to impose structures during training for better OOD detection, these methods face the trade-off between OOD separability and model performance. Moreover, such approaches lack the flexibility of post-hoc score functions, as they necessitate model retraining which can be both time-consuming and computationally expensive.

**Score functions.** Recently, developing score functions for pretrained models on ID data has gained attention due to its ease of implementation and flexibility. These methods typically either couple

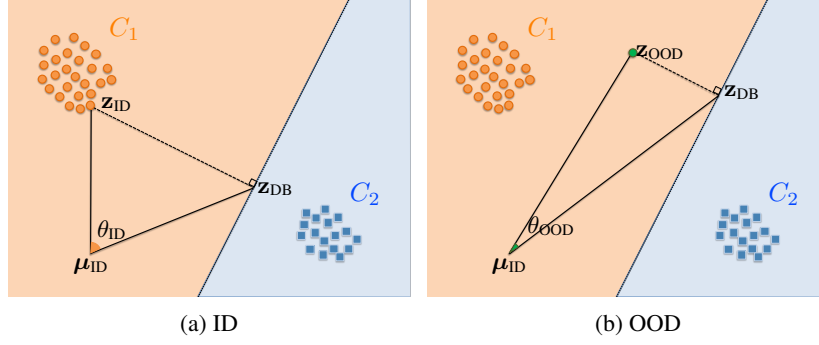

Figure 1: Geometric visualization of ORA for in-distribution (*left*) and out-of-distribution (*right*) cases. ORA focuses on the angular distance between the feature representation and the decision boundary, from the perspective of the in-distribution mean. The angle  $\theta$  serves as the distinguishing factor between ID and OOD samples, with  $\theta_{ID} > \theta_{OOD}$ .

feature representations with distance metrics, or measure a model’s confidence using its logits. Beyond canonical works such as Maximum Softmax Probability [Hendrycks and Gimpel, 2022], ODIN score [Liang et al., 2018], Energy score [Liu et al., 2020], we observed many advancements in post-hoc score design. For example, the activation shaping algorithms such as ASH [Djurisic et al., 2023], Scale [Xu et al., 2024b], and ReAct [Sun et al., 2021], apply activation truncations to feature representations, reducing model’s confidence for OOD data. These methods can be used in conjunction with ORA improving the performance. Recent distance-based methods KNN [Sun et al., 2022], NNGuide [Park et al., 2023], R-Mah [Ren et al., 2021] and fDBD [Liu and Qin, 2024] successfully utilized the feature representations from networks. Both NNGuide and KNN assign a score to a sample based on the  $k$ th nearest neighbor in ID training set. R-Mah measures the relative Mahalanobis distance between class centroids and the overall data centroid. In contrast, fDBD assigns a score to a sample based on its estimate of the distance between the feature representation and the decision boundaries. Moreover, recent angle-based methods such as P-Cos [Galil et al.] and R-Cos [Bitterwolf et al., 2023] assign scores based on the cosine similarity between representations and class centroids.

Our work falls into the score function category, serving as a plug-in for any pre-trained model on ID data. ORA combines feature space and logit space methods by utilizing the relative angle between the feature representation and its projections to the decision boundaries. Among the existing works, the closest approach to our method is fDBD, which uses a lower bound estimate to the decision boundaries. However, the regularization term they introduced inadvertently includes a term in their equation that is uncorrelated with being OOD or ID and can change spuriously, impeding performance. In contrast, we provide a score function that effectively incorporates in-distribution context and maintains scale invariance, all without extra regularization terms.

### 3 Method

**Problem Setting.** We consider a supervised classification setting with input space  $\mathcal{X}$  and label space  $\mathcal{Y}$ , following the literature Yang et al. [2024]. Given a model  $f : \mathcal{X} \rightarrow \mathbb{R}^{|\mathcal{Y}|}$  pretrained on an in-distribution dataset  $D_{ID} = \{(\mathbf{x}_i, y_i)\}_{i=1}^N$ , where elements of  $D_{ID}$  are drawn from a joint distribution  $P_{\mathcal{X}\mathcal{Y}}$ , with support  $\mathcal{X} \times \mathcal{Y}$ . We denote its marginal distribution on  $\mathcal{X}$  as  $P_{ID}$ . The *OOD detection problem* aims to determine whether an input sample originates from the in-distribution  $P_{ID}$  or not. Let  $\mathcal{Y}_{OOD}$  be a set of labels such that  $\mathcal{Y} \cap \mathcal{Y}_{OOD} = \emptyset$ . OOD samples are drawn from a distribution  $P_{OOD}$  which is the marginal distribution on  $\mathcal{X}$  of the joint distribution over  $\mathcal{X} \times \mathcal{Y}_{OOD}$  i.e., they share the same input space  $\mathcal{X}$  as in-distribution samples, but have labels outside  $\mathcal{Y}$ . Shifting from  $P_{ID}$  to  $P_{OOD}$  corresponds to a semantic change in the label space.

The OOD decision can be made via the function  $d : \mathcal{X} \rightarrow \{ID, OOD\}$  given a *score function*  $s : \mathcal{X} \rightarrow \mathbb{R}$  such that:

$$d(\mathbf{x}; s, f) = \begin{cases} ID & \text{if } s(\mathbf{x}; f) \geq \lambda \\ OOD & \text{if } s(\mathbf{x}; f) < \lambda \end{cases}$$

where samples with high scores are classified as ID, according to the threshold  $\lambda$ . For example, to compute the standard FPR95 metric [Yang et al., 2024], the threshold  $\lambda$  is chosen such that it correctly classifies 95% of ID held-out data. An ideal OOD score function should capture differences in model outputs between samples drawn from  $P_{\text{ID}}$  and  $P_{\text{OOD}}$ , effectively detecting inputs from unseen classes.

### 3.1 OOD Detection with Relative Angles

This section introduces our OOD score function, which leverages relative angles in feature space to relate feature representations to decision boundaries, distinguishing ID from OOD samples. Figure 1 provides a geometric visualization of our method. Our approach leverages the geometric relationships between three key points in the feature space: (i) the initial representation of a sample, (ii) its projection onto the decision boundary, and (iii) the mean of in-distribution features.

We propose using the relation between feature representations and decision boundaries by deriving closed-form plane equations for the decision boundaries between any two classes. Specifically, we examine the angle formed between the feature representation vector and its projection onto the decision boundary. However, this angle is sensitive to the choice of origin, creating an ambiguity as the geometric relationship between the feature representation and the decision boundary should be translation-invariant. To address this, we propose to represent features in a reference frame relative to the mean of the in-distribution samples. Therefore, we incorporate ID characteristics by centering around its mean, while ensuring scale and translation invariance.

We observe that the angle between the centered representation and its projection onto the decision boundary is larger for ID data, indicating them requiring higher cost to change their label which captures the model’s confidence. In contrast, for OOD data, angle is smaller since they are expected to be more unstable, as they do not contain strong clues about their predicted classes (see Figure 1 for a conceptual explanation).

Our framework provides a concise scoring with useful properties such as translation and scale invariance. These properties enable ORA to be used in conjunction with existing activation shaping algorithms and allow for confidence aggregation across different models through score summation.

### 3.2 Features on the Decision Boundary

In this section, we derive the mathematical equations and demonstrate the properties of our score. The model  $f$  can be rewritten as a composed function  $f_1 \circ \dots \circ f_{L-1} \circ g$ , where  $L$  is the number of layers and  $g : \mathbb{R}^D \rightarrow \mathbb{R}^{|\mathcal{Y}|}$  corresponds to the last layer classification head. The function  $g(\mathbf{z}) = \mathbf{W}\mathbf{z} + \mathbf{b}$  maps penultimate layer features  $\mathbf{z} \in \mathbb{R}^D$  to the logits space via  $\mathbf{W} \in \mathbb{R}^{|\mathcal{Y}| \times D}$  and  $\mathbf{b} \in \mathbb{R}^{|\mathcal{Y}|}$ . The decision boundary between any two classes  $y_1$  and  $y_2$  with  $y_1 \neq y_2$  can be represented as:

$$DB_{y_1, y_2} = (\mathbf{w}_{y_1} - \mathbf{w}_{y_2})^T \mathbf{z} + b_{y_1} - b_{y_2} = 0$$

where  $\mathbf{w}_{y_1}$  (or  $\mathbf{w}_{y_2}$ ) denotes the the row vectors of  $\mathbf{W}$  corresponding to class  $y_1$  (respectively  $y_2$ ) and similarly,  $b_{y_1}, b_{y_2}$  are the bias values corresponding to classes  $y_1$  and  $y_2$ . Intuitively, given a fixed classifier, this equation is satisfied for all  $\mathbf{z}$ ’s such that their corresponding logits for class  $y_1$  and  $y_2$  are equal. Then, feature representations can be projected onto the hyperplane that defines the decision boundary:

$$\mathbf{z}_{db} = \mathbf{z} - \frac{(\mathbf{w}_{y_1} - \mathbf{w}_{y_2})^T \mathbf{z} + (b_{y_1} - b_{y_2})}{\|\mathbf{w}_{y_1} - \mathbf{w}_{y_2}\|^2} (\mathbf{w}_{y_1} - \mathbf{w}_{y_2}) \quad (1)$$

Let  $\boldsymbol{\mu}_{\text{ID}} \in \mathbb{R}^D$  be the mean of the in-distribution feature representations. Centering w.r.t.  $\boldsymbol{\mu}_{\text{ID}}$  corresponds to shifting the origin to  $\boldsymbol{\mu}_{\text{ID}}$ . In this new reference frame, three key points form a triangle in  $D$ -dimensional space: the centered feature vector  $(\mathbf{z} - \boldsymbol{\mu}_{\text{ID}})$ , its projection onto the decision boundary  $(\mathbf{z}_{db} - \boldsymbol{\mu}_{\text{ID}})$  and the new origin (see Figure 1). Then, rather than the absolute distance between  $\mathbf{z}$  and  $\mathbf{z}_{db}$ , we use the relative angle  $\theta_{y_1, y_2}(\mathbf{z})$  from the in-distribution feature representation’s reference frame. This captures *the position of features and the decision boundaries relative to the in-distribution data*, while also being scale invariant:

$$\theta_{y_1, y_2}(\mathbf{z}) = \arccos \left( \frac{\langle \mathbf{z} - \boldsymbol{\mu}_{\text{ID}}, \mathbf{z}_{db} - \boldsymbol{\mu}_{\text{ID}} \rangle}{\|\mathbf{z} - \boldsymbol{\mu}_{\text{ID}}\| \cdot \|\mathbf{z}_{db} - \boldsymbol{\mu}_{\text{ID}}\|} \right) \quad (2)$$

Our score function captures the maximum discrepancy of the relative angles between the centered feature representation and its projections on  $DB_{\hat{y}, y'}$ , where  $\hat{y} = \arg \max_{y \in \mathcal{Y}} g(\mathbf{z})$  is the predicted class, and  $y' \in \mathcal{Y}$ ,  $y' \neq y$ . Therefore for a sample  $\mathbf{x} \in \mathcal{X}$ , given  $\mathbf{z} = f_1 \circ \dots \circ f_{L_1}(\mathbf{x})$  we can write the score  $s(\mathbf{x}, f)$  as a function of  $\mathbf{z}$ :

$$\tilde{s}(\mathbf{z}) = \max(\{\theta_{y, y'}(\mathbf{z})\}_{y' \in \mathcal{Y}, y' \neq y}) \quad (3)$$

Intuitively, our score function captures several key aspects:

- **Confidence measure.** The angle between the feature representation and its projection onto a decision boundary is proportional to the distance between them, serving as a proxy for the model’s confidence.
- **In-distribution context.** By centering the space using the mean of in-distribution features, we incorporate ID statistics, improving angle separability across points.
- **Maximum discrepancy.** It selects the furthest decision boundary by finding the maximum angle across classes. This captures the model’s confidence in the least likely class.
- **Scale invariance.** Unlike absolute distances, angles remain consistent even if the feature space is scaled, allowing for fair comparisons between different models.

**Relation with the state-of-the-art fDBD [Liu and Qin, 2024].** We now provide a geometric interpretation for the score function fDBD. Using our analysis, we identified that their score can directly be mapped into the triangle we formed in Figure 1. For a sample  $\mathbf{x} \in \mathcal{X}$ :

$$\text{fDBD}(\mathbf{z}) = \frac{d(\mathbf{z}, \mathbf{z}_{db})}{\|\mathbf{z} - \boldsymbol{\mu}_{ID}\|}$$

where  $\mathbf{z} \in \mathbb{R}^D$  is the feature representations of the input  $x \in \mathcal{X}$ ,  $\mathbf{z}_{db} \in \mathbb{R}^D$  is its projection onto the decision boundary, and  $d(\cdot, \cdot)$  is the euclidean distance. Although seemingly unrelated, we can connect this score to our relative angle and demonstrate that the regularization term on the denominator brings a term that does not effectively discriminate between OOD and ID. Using translation invariance of the euclidean distance, the same score can be written as:

$$\text{fDBD}(\mathbf{z}) = \frac{d(\mathbf{z} - \boldsymbol{\mu}_{ID}, \mathbf{z}_{db} - \boldsymbol{\mu}_{ID})}{d(\mathbf{z} - \boldsymbol{\mu}_{ID}, 0)}$$

One can observe that, this is the ratio of two sides of the triangle formed between the points  $\mathbf{z} - \boldsymbol{\mu}_{ID}$ ,  $\mathbf{z}_{db} - \boldsymbol{\mu}_{ID}$  and the origin. Using the law of sines:

$$\frac{d(\mathbf{z} - \boldsymbol{\mu}_{ID}, \mathbf{z}_{db} - \boldsymbol{\mu}_{ID})}{\sin(\theta)} = \frac{d(\mathbf{z} - \boldsymbol{\mu}_{ID}, 0)}{\sin(\alpha)} \Rightarrow \frac{\sin(\theta)}{\sin(\alpha)} = \frac{d(\mathbf{z} - \boldsymbol{\mu}_{ID}, \mathbf{z}_{db} - \boldsymbol{\mu}_{ID})}{d(\mathbf{z} - \boldsymbol{\mu}_{ID}, 0)} = \text{fDBD}(\mathbf{z}) \quad (4)$$

where  $\theta$  and  $\alpha$  are the angles opposite to the sides  $\mathbf{z} - \boldsymbol{\mu}_{ID} - (\mathbf{z}_{db} - \boldsymbol{\mu}_{ID})$  and  $\mathbf{z} - \boldsymbol{\mu}_{ID}$  respectively. Although the observation they made on comparing the distances to the decision boundaries at equal deviation levels from the mean of in-distribution is inspiring, we claim that the angle  $\alpha$  is not very informative for ID and OOD separation. This is because  $\alpha$  is connected to the magnitude of the feature vector relative to  $\boldsymbol{\mu}_{ID}$ , which may not directly correlate with OOD characteristics. On Figure 2 we show the  $\sin(\alpha)$  values between CIFAR-10 [Krizhevsky, 2009] and Texture [Cimpoi et al., 2014] datasets, empirically justifying that including this term impedes fDBD’s performance. Omitting the denominator from Equation 4 allows to effectively capture the relation between the feature representation and the decision boundary from the mean of in-distribution’s view.

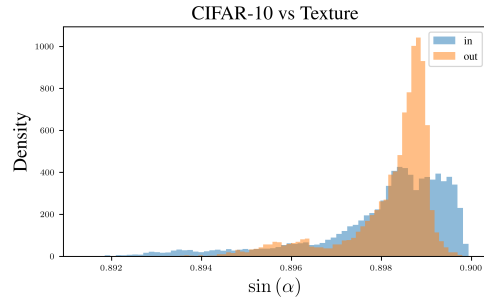

Figure 2: Histogram of ID (CIFAR-10) and OOD (Texture) samples with respect to the sine of the angle formed with the vector  $\mathbf{z} - \boldsymbol{\mu}_{ID}$ . This empirically shows that  $\sin(\alpha)$  is not highly informative for distinguishing ID from OOD.

Table 1: Average FPR95 (%) on the ImageNet OOD detection benchmark. Each column corresponds to a different detection method, and each row to a model backbone. Lower values indicate better performance. The best result per row is highlighted in **bold**.

| Model           | MSP   | MaxLogit | Energy | R-Mah        | R-Cos        | P-Cos        | NNG   | KNN+  | fDBD  | ORA          |
|-----------------|-------|----------|--------|--------------|--------------|--------------|-------|-------|-------|--------------|
| ConvNeXt        | 63.54 | 60.69    | 78.70  | 45.79        | 46.99        | 49.37        | 39.54 | 47.40 | 39.03 | <b>34.92</b> |
| ConvNeXt-pre    | 45.57 | 42.39    | 46.95  | 34.91        | 36.16        | 35.47        | 76.91 | 77.23 | 42.13 | <b>29.53</b> |
| Swin            | 61.99 | 59.21    | 65.78  | <b>45.25</b> | 46.26        | 49.37        | 57.34 | 53.79 | 52.34 | 51.56        |
| Swin-pre        | 46.20 | 40.86    | 42.33  | 39.40        | 35.66        | <b>33.94</b> | 44.06 | 51.34 | 38.92 | 35.13        |
| DeiT            | 57.48 | 57.52    | 70.05  | 52.51        | <b>47.63</b> | 61.62        | 58.02 | 71.34 | 55.98 | 54.16        |
| DeiT-pre        | 57.45 | 54.72    | 55.56  | 39.37        | 38.49        | 39.11        | 43.56 | 44.18 | 46.69 | <b>37.76</b> |
| EVA             | 43.75 | 40.37    | 43.40  | <b>27.45</b> | 27.94        | 27.68        | 37.33 | 34.19 | 36.10 | 33.37        |
| ResNet-50       | 66.95 | 64.29    | 58.41  | 83.29        | 59.51        | 45.53        | 55.22 | 53.97 | 51.19 | <b>43.63</b> |
| ResNet-50 (SCL) | 50.06 | 97.59    | 98.46  | 77.52        | 48.18        | 31.57        | 98.80 | 38.47 | 32.78 | <b>25.04</b> |
| Average         | 54.78 | 57.52    | 62.18  | 49.50        | 42.98        | 41.52        | 56.75 | 52.43 | 43.90 | <b>38.34</b> |

## 4 Experiments

In this section, we first test ORA on a large-scale ImageNet OOD benchmark [Deng et al., 2009] that spans nine models –including ConvNeXt [Liu et al., 2022], Swin [Liu et al., 2021], DeiT [Touvron et al., 2021] and EVA [Fang et al., 2023]– to establish the performance beyond the usual ResNet-50 [He et al., 2016] setting. We then demonstrate how ORA benefits from contrastively learned features (i) on CLIP [Radford et al., 2021] in both zero-shot and linear-probe modes, and (ii) on CIFAR-10 [Krizhevsky, 2009] and ImageNet with ResNet18/50 checkpoints trained with supervised contrastive (SCL) loss [Khosla et al., 2020]. Next, we show that ORA’s scale-invariant scores can be ensemble-summed across architectures for additional gains, and that it pairs seamlessly with post-hoc activation-shaping methods such as ReAct and ASH. Finally, we present an ablation study to assess the contributions of key design choices.

**Benchmarks.** We consider two widely used benchmarks: CIFAR-10 [Krizhevsky, 2009] and ImageNet [Deng et al., 2009]). We included the evaluation on CIFAR-10 OOD Benchmark to show the performance on smaller scale datasets. In CIFAR-10 experiments, we use a pretrained ResNet-18 architecture He et al. [2016] trained with supervised contrastive loss [Khosla et al., 2020], following previous literature Liu and Qin [2024], Sun et al. [2022], Schwag et al. [2021]. During inference 10,000 test samples are used to set the in-distribution scores and choose the threshold value  $\lambda$ ; while the datasets SVHN [Netzer et al., 2011], iSUN [Xu et al., 2015], Places365 [Zhou et al., 2017] and Texture [Cimpoi et al., 2014] are used to obtain out-of-distribution scores and metric evaluation.

For the large-scale ImageNet OOD benchmark, we extend prior evaluations [Liu and Qin, 2024, Sun et al., 2022, Park et al., 2023, Ren et al., 2021, Sun et al., 2021, Xu et al., 2024b] by going beyond ResNet-50 and including a diverse set of nine models, such as ConvNeXt [Liu et al., 2022], Swin Transformer [Liu et al., 2021], DeiT [Touvron et al., 2021], and EVA [Fang et al., 2023], along with their ImageNet-21k pretrained counterparts when available. This broader evaluation allows a more comprehensive assessment of OOD detection performance across modern architectures. A validation set of 50,000 ImageNet samples is used to set ID scores and the threshold, while the OOD datasets include iNaturalist [Van Horn et al., 2018], SUN [Xiao et al., 2010], Places365 [Zhou et al., 2017], and Texture [Cimpoi et al., 2014]. Note that, in this typical OOD Detection Benchmarks the samples that have same classes as ID are removed from their OOD counterparts, following the work Huang and Li [2021] and fitting into our problem setting.

**Metrics.** We report two metrics in our experiments: False-positive rate at 95% true positive rate (FPR95), and Area Under the Receiver Operating Characteristic Curve (AUROC). FPR95 measures what percentage of OOD data we falsely classify as ID where our threshold includes 95% of ID data. Therefore, smaller FPR95 indicates a better performance by sharply controlling the false positive rate. On the other hand, AUROC measures the model’s ability to distinguish between ID and OOD by calculating the area under the curve that plots the true positive rate against the false positive rate across thresholds. AUROC shows how rapidly we include ID data while paying the cost of including false positives. Thus, higher AUROC shows a better result.

## 4.1 OOD Detection on ImageNet Benchmark

Table 1 presents an extensive evaluation of OOD detection performance on the ImageNet benchmark, spanning 9 diverse model backbones and 10 scoring methods. In contrast to prior work that typically centers evaluation on ResNet-50 [Liu and Qin [2024], Sun et al. [2022], Park et al. [2023], Ren et al. [2021], Sun et al. [2021], Xu et al. [2024b]], we expand the setting to include modern transformer-based architectures—ConvNeXt, Swin, DeiT, and EVA—as well as their ImageNet-21k pretrained variants when available. This large-scale comparison provides a better performance evaluation across architectures.

ORA consistently demonstrates strong performance across the board. It achieves the best average FPR95 across all models at 38.34%, outperforming the second-best method by a margin of 3.18% and the best FPR95 in 5 out of 9 model settings. Notably, ORA achieves the single best FPR95 score overall with 25.04% on the ResNet-50 (SCL) model, outperforming the next-best score of 27.45% obtained by R-Mah with EVA by a margin of 2.41%.

Furthermore, in the few cases where ORA is not the top-performing method—such as with vanilla Swin or DeiT models—there is no alternative method that clearly dominates. The best-performing method varies across these settings (R-Mah, R-Cos and P-Cos), indicating that no other baseline consistently adapts well to different backbones. In contrast, ORA remains within the top three methods across all model architectures, demonstrating both robustness and versatility. These results highlight ORA’s ability to generalize across both convolutional and transformer-based models, pretrained or otherwise, and establish it as a strong state-of-the-art approach for OOD detection on ImageNet.

## 4.2 OOD Detection with CLIP

In this section, we evaluate the performance of post-hoc OOD detection methods on the CLIP architecture. CLIP, with its pre-trained vision-language capabilities, provides a foundation for OOD detection. We explore two approaches: linear probing and a zero-shot extension that leverages CLIP’s inherent structure to avoid additional training.

**Linear probing with CLIP.** For methods requiring decision boundaries (e.g. Hendrycks and Gimpel [2022], Liu et al. [2020], Liu and Qin [2024], and ORA), we used the vision encoder of CLIP to extract features and trained a linear probe for the classification task. While effective, this reduces flexibility due to the need for additional training.

**Zero-shot OOD detection with CLIP.** To mitigate the limitation of requiring decision boundaries, we derive a zero-shot extension that defines them using text embeddings. For vision-language models like CLIP, we define the decision boundaries by vectors whose cosine similarity to the text embeddings of two classes are equal. Since cosine similarity is scale-invariant, these vectors are unique up to its norm. To compute the projection of a feature representation onto the decision boundary, we use normalized representations. Let  $\mathbf{z}_{c_1}$  and  $\mathbf{z}_{c_2}$  be the text embeddings of

classes  $c_1$  and  $c_2$ , and  $\mathbf{z}$  be the feature representation. The decision boundary between  $c_1$  and  $c_2$  satisfies: (i)  $\langle \mathbf{z}, \mathbf{z}_{c_1} \rangle = \langle \mathbf{z}, \mathbf{z}_{c_2} \rangle$ , (ii)  $\langle \mathbf{z}, (\mathbf{z}_{c_1} - \mathbf{z}_{c_2}) \rangle = 0$ . Define  $\mathbf{u} = \frac{(\mathbf{z}_{c_1} - \mathbf{z}_{c_2})}{\|(\mathbf{z}_{c_1} - \mathbf{z}_{c_2})\|_2}$ . Then, the projection onto the decision boundary is  $\mathbf{z}_{db} = \mathbf{z} - \langle \mathbf{z}, \mathbf{u} \rangle \cdot \mathbf{u}$ . This projection enables zero-shot computation of the ORA score. Table 3 summarizes the performance of these methods in both linear probe and zero-shot settings. ORA achieves a strong performance on both linear probing and zero-shot settings with 23.94% and 25.85% FPR95 respectively.

**Positive effect of contrastive features.** An important observation from our results is the positive effect of contrastive learning on ORA’s performance. Contrastive objectives—whether within a single modality, such as SCL, or across modalities, as in CLIP’s image-text training—impose a geometric structure on the representation space that separates semantic concepts. ORA benefits particularly from this structure as confirmed by the results in Table 2: we show that ORA delivers the lowest

Table 2: Average OOD performance across CIFAR-10 (ResNet-18) and ImageNet (ResNet-50) benchmarks. All methods are evaluated using checkpoints trained with SCL. Reported with FPR95↓ and AUROC↑. Best results per column are in **bold**.

| Method     | CIFAR-10     |              | ImageNet     |              |
|------------|--------------|--------------|--------------|--------------|
|            | FPR95↓       | AUROC↑       | FPR95↓       | AUROC↑       |
| SSD+       | 18.51        | 97.02        | 63.24        | 80.09        |
| KNN+       | 13.35        | 97.56        | 38.47        | 90.91        |
| fDBD       | 11.85        | 97.60        | 32.78        | 92.86        |
| <b>ORA</b> | <b>10.97</b> | <b>97.67</b> | <b>25.04</b> | <b>94.26</b> |

Table 3: OOD detection performance on the ImageNet benchmark using CLIP-ViT-H/14 features. We report FPR95 (%) and AUROC (%) for four OOD datasets under two regimes: linear probing (lp) and zero-shot (zs). The best result per column is highlighted in **bold**.

| Method    | iNaturalist |              | SUN          |              | Places       |              | Texture      |              | Avg          |              |
|-----------|-------------|--------------|--------------|--------------|--------------|--------------|--------------|--------------|--------------|--------------|
|           | FPR95↓      | AUROC↑       | FPR95↓       | AUROC↑       | FPR95↓       | AUROC↑       | FPR95↓       | AUROC↑       | FPR95↓       | AUROC↑       |
| MSP/lp    | 15.74       | 96.64        | 46.00        | 88.68        | 48.73        | 87.40        | 40.87        | 87.98        | 37.83        | 90.18        |
| Energy/lp | 7.26        | 97.94        | 34.62        | 92.13        | 41.32        | 90.05        | 37.02        | 90.98        | 30.06        | 92.77        |
| MaxL/lp   | 9.02        | 97.91        | 37.15        | 91.70        | 42.25        | 89.86        | 36.37        | 90.80        | 31.20        | 92.57        |
| NNG/lp    | 7.26        | 97.94        | 34.62        | 92.12        | 41.32        | 90.05        | 37.02        | 90.98        | 30.06        | 92.77        |
| KNN/zs    | 80.20       | 87.86        | 86.68        | 84.63        | 73.51        | 86.07        | 70.27        | 84.60        | 77.66        | 85.79        |
| fDBD/zs   | 9.31        | 98.11        | 22.32        | 94.78        | 29.15        | 93.20        | 40.12        | 90.25        | 25.23        | 94.08        |
| fDBD/lp   | 5.62        | 98.48        | 32.18        | 93.89        | 35.74        | 92.54        | 27.13        | 93.71        | 25.17        | 94.66        |
| Pcos/zs   | 19.86       | 96.09        | 28.67        | 93.58        | 36.09        | 91.84        | 45.21        | 88.97        | 32.46        | 92.62        |
| MCM/zs    | 17.81       | 96.52        | 26.04        | 93.94        | 35.07        | 91.54        | 41.12        | 90.92        | 30.01        | 93.23        |
| RMh/zs    | <b>3.64</b> | <b>98.85</b> | 30.71        | 93.12        | 34.72        | 92.18        | <b>21.21</b> | <b>93.84</b> | <b>22.57</b> | 94.49        |
| ORA/zs    | 14.12       | 97.41        | <b>22.97</b> | <b>94.97</b> | <b>28.01</b> | <b>93.41</b> | 38.28        | 90.73        | 25.85        | 94.13        |
| ORA/lp    | 6.66        | 98.16        | 30.35        | 94.43        | 33.79        | 93.20        | 24.95        | 94.34        | 23.94        | <b>95.03</b> |

average FPR95 on both benchmarks, cutting the previous best score from 11.85% to 10.97% on CIFAR-10 (-0.88 pp) and from 32.78% to 25.04% on ImageNet (-7.74 pp), thereby outperforming every competing method with SCL-trained ResNet-18 and ResNet-50 backbones. Similarly, in Table 3, ORA shows strong results in both the zero-shot and linear probe settings of CLIP. These findings suggest that ORA is particularly well-suited to contrastively structured representations, hinting at a deeper connection between contrastive learning and OOD detection performance.

### 4.3 Model Ensembling with ORA

Recent works [Xue et al. \[2024\]](#) and [Xu et al. \[2024a\]](#) show that creating an ensemble of models can enhance the OOD performance. Inspired from these works, and from the observation that scale invariant representations are compatible between distinct models [[Moschella et al., 2023](#)], we demonstrate that *scale-invariant score functions can aggregate the confidences from different models*, by simply summing their scores. On Table 4 we show the individual performances of models ResNet-50, ResNet-50 with SCL and ViT-B/16 as well as their combined performances using the scale-invariant ORA.

Note that we demonstrate the scale-invariance property of fDBD in Equation 4 and include it in ensemble experiments to compare with ORA. It can be seen that for both of the score functions, the performance of ensemble is better than their individual counterparts showing that score aggregation improves their OOD performance. Moreover, the ensemble with ORA achieves a performance with 22.53% FPR95 and 96.41% AUROC, improving the metrics compared to the best individual performer in the ensemble by 2.51% and 2.15% respectively. In summary, we demonstrate that scale-invariance of ORA allows aggregating different models’ confidences to solve OOD Detection Problem.

### 4.4 ORA with Activation Shaping Algorithms

Recent methods ReAct [Sun et al. \[2021\]](#), ASH [Djurisic et al. \[2023\]](#) and Scale [Xu et al. \[2024b\]](#) show their success to modify the feature representations to reduce model’s overconfident predictions. All three methods adopt a hyperparameter percentile to choose how to truncate and scale the feature representations using ID data statistics. When combined with Energy [Liu et al. \[2020\]](#) score, these methods improve the OOD Detection performance. On Table 5 we show that applying ORA scoring

Table 4: ORA can be used for ensemble OOD detection due to its scale-invariance property. Evaluated on the ImageNet OOD benchmark. Best performance is highlighted in **bold**.

| Method                 | FPR95↓       | AUROC↑       |
|------------------------|--------------|--------------|
| fDBD w/ResNet50        | 51.35        | 89.20        |
| fDBD w/ResNet50-supcon | 32.78        | 92.86        |
| fDBD w/ViT-B/16        | 41.55        | 91.05        |
| ORA w/ResNet50         | 44.58        | 90.68        |
| ORA w/ResNet50-supcon  | 25.04        | 94.26        |
| ORA w/ViT-B/16         | 39.92        | 91.38        |
| Ensemble fDBD          | 31.05        | 95.29        |
| Ensemble ORA           | <b>22.53</b> | <b>96.41</b> |

Table 5: ORA can be used as a plug-in on top of activation shaping. Evaluated on the ImageNet OOD benchmark.

| Method      | FPR95↓       | AUROC↑       |
|-------------|--------------|--------------|
| ORA w/ReLU  | 25.04        | 94.26        |
| ORA w/ASH   | 23.47        | 94.58        |
| ORA w/Scale | 23.34        | 94.37        |
| ORA w/ReAct | <b>20.36</b> | <b>96.29</b> |

after activation shaping algorithms improves the performance. Specifically combining ORA with ReAct reduces FPR95 from 25.04% to 20.36% highlighting both the flexibility and efficacy of our method. This demonstrates that ORA can flexibly be combined with activation shaping algorithms.

#### 4.5 Ablation Studies

In this section, we will demonstrate the effectiveness of design choices on our score function ORA. We first justify our choice of centering in  $\mu_{ID}$  empirically, among the candidates:  $\mu_{ID}$ ,  $\mu_{y_{pred}}$ ,  $\mu_{y_{target}}$  and  $\max(\mathbf{z}_{ID})$ . Then, we compare different angle aggregation techniques across classes by replacing our  $\max(\{\theta_{y, y'}\}_{y' \in \mathcal{Y}, y' \neq y})$  with mean and min across classes.

**Centering with  $\mu_{ID}$  incorporates ID-statistics without biasing towards one particular class.** Table 6 shows the performance comparison between centerings with respect to different points. Using the relative angle with respect to the predicted ( $\mu_{y_{pred}}$ ) or target ( $\mu_{y_{target}}$ ) class centroid induce a bias towards the corresponding class, which in the end hinders the compatibility between angles coming across classes. On the other hand, using  $\max(\mathbf{z}_{ID})$  shifts every feature representation to the same orthant, reducing to simply computing the absolute distance between feature representations and the decision boundaries, which is agnostic from the in-distribution feature statistics. We observe a significant improvement in performance when computing relative angles using  $\mu_{ID}$ , demonstrating the importance of incorporating in-distribution (ID) statistics when measuring the relationship between feature representations and decision boundaries. ORA with  $\mu_{ID}$  centering improves the FPR95 by up to 1.45% and 7.4% on CIFAR-10 and ImageNet respectively while also improving the AUROC for both benchmarks.

Table 6: Ablation on different centering strategies. Evaluated on both CIFAR-10 and ImageNet OOD benchmarks.

| Method                         | CIFAR-10     |              | ImageNet     |              |
|--------------------------------|--------------|--------------|--------------|--------------|
|                                | FPR95↓       | AUROC↑       | FPR95↓       | AUROC↑       |
| ORA w/ $\mu_{y_{pred}}$        | 12.42        | 97.59        | 43.02        | 89.86        |
| ORA w/ $\mu_{y_{target}}$      | 13.26        | 97.48        | 28.29        | 93.46        |
| ORA w/ $\max(\mathbf{z}_{ID})$ | 13.39        | 97.42        | 32.44        | 92.01        |
| ORA w/ $\mu_{ID}$              | <b>10.97</b> | <b>97.67</b> | <b>25.04</b> | <b>94.26</b> |

**Looking at the furthest class is better for ID/OOD separation.** On Table 7 we explored different ways to aggregate class specific angles. Originally, we devise our score function to return the maximum relative angle discrepancy between the feature representation across decision boundaries. Intuitively, this suggests that considering the furthest possible class that a feature belongs from the mean of in-distribution’s perspective is effective to distinguish OOD from ID. On the other hand, comparing the minimum focuses on the smallest relative angle, reducing the separability significantly. Table 7 demonstrates taking the maximum across classes clearly outperforms mean and min aggregations, improving FPR95 and AUROC metrics on both benchmarks. Specifically the difference is higher on our large-scale experiments reducing the FPR95 by 7.72% and increasing the AUROC by 1.39% compared to the second best aggregation.

Table 7: Ablation on the different score aggregations across classes. Evaluated under both ImageNet and CIFAR-10 OOD benchmarks.

| Method      | CIFAR-10     |              | ImageNet     |              |
|-------------|--------------|--------------|--------------|--------------|
|             | FPR95↓       | AUROC↑       | FPR95↓       | AUROC↑       |
| ORA w/ min  | 32.02        | 95.23        | 79.15        | 81.38        |
| ORA w/ mean | 11.84        | 97.59        | 32.76        | 92.87        |
| ORA w/ max  | <b>10.97</b> | <b>97.67</b> | <b>25.04</b> | <b>94.26</b> |

## 5 Conclusion

In this paper, we introduce a novel angle-based OOD detection score function. As a post-hoc measure of model confidence, ORA offers several key advantages: it is (i) hyperparameter-free, (ii) model-agnostic and (iii) scale-invariant. These features allow ORA to be applied to arbitrary pretrained models and used in conjunction with existing activation shaping algorithms, enhancing the performance. Notably, its scale-invariant nature enables simple aggregation of multiple models’ confidences through score summation, allowing a creation of an effective model ensemble for OOD detection. Our extensive experiments demonstrate that ORA achieves state-of-the-art performance, using the relationship between the feature representations and decision boundaries relative to the ID statistics effectively. Despite the state-of-the-art performance achieved by ORA, one possible limitation might be the use of the mean alone to capture the ID statistics in our score. As a future direction, we plan to mitigate this possible limitation by incorporating multiple relative angles to better capture the ID-statistics beyond the mean, aiming to further improve OOD detection performance. We hope that our approach inspires further research into geometric interpretations of model confidence for OOD detection.

## References

- P. Bevandić, S. Šegvić, I. Krešo, and M. Oršić. Discriminative out-of-distribution detection for semantic segmentation, 2019. URL <https://openreview.net/forum?id=H1x1noAqKX>.
- J. Bitterwolf, M. Müller, and M. Hein. In or out? fixing imagenet out-of-distribution detection evaluation. In *Proceedings of the 40th International Conference on Machine Learning*, pages 2471–2506, 2023.
- D. Bogdoll, M. Nitsche, and J. M. Zöllner. Anomaly detection in autonomous driving: A survey. In *Proceedings of the IEEE/CVF conference on computer vision and pattern recognition*, pages 4488–4499, 2022.
- X. Chen, Y. Yang, Z. Wang, and B. Mirzasoleiman. Data distillation can be like vodka: Distilling more times for better quality. In *The Twelfth International Conference on Learning Representations*, 2023.
- M. Cimpoi, S. Maji, I. Kokkinos, S. Mohamed, and A. Vedaldi. Describing textures in the wild. In *Proceedings of the IEEE conference on computer vision and pattern recognition*, pages 3606–3613, 2014.
- J. Deng, W. Dong, R. Socher, L.-J. Li, K. Li, and L. Fei-Fei. Imagenet: A large-scale hierarchical image database. In *2009 IEEE conference on computer vision and pattern recognition*, pages 248–255. Ieee, 2009.
- C. P. Diehl and J. B. Hampshire. Real-time object classification and novelty detection for collaborative video surveillance. In *Proceedings of the 2002 International Joint Conference on Neural Networks. IJCNN’02 (Cat. No. 02CH37290)*, volume 3, pages 2620–2625. IEEE, 2002.
- A. Djurisic, N. Bozanic, A. Ashok, and R. Liu. Extremely simple activation shaping for out-of-distribution detection. In *The Eleventh International Conference on Learning Representations*, 2023. URL <https://openreview.net/forum?id=ndYXTEL6cZz>.
- A. Dosovitskiy, L. Beyer, A. Kolesnikov, D. Weissenborn, X. Zhai, T. Unterthiner, M. Dehghani, M. Minderer, G. Heigold, S. Gelly, et al. An image is worth 16x16 words: Transformers for image recognition at scale. In *International Conference on Learning Representations*, 2020.
- X. Du, Z. Wang, M. Cai, and S. Li. Towards unknown-aware learning with virtual outlier synthesis. In *International Conference on Learning Representations*, 2022. URL <https://openreview.net/forum?id=TW7d65uYu5M>.
- Y. Fang, W. Wang, B. Xie, Q. Sun, L. Wu, X. Wang, T. Huang, X. Wang, and Y. Cao. Eva: Exploring the limits of masked visual representation learning at scale. In *Proceedings of the IEEE/CVF conference on computer vision and pattern recognition*, pages 19358–19369, 2023.
- T. Fernando, H. Gammulle, S. Denman, S. Sridharan, and C. Fookes. Deep learning for medical anomaly detection—a survey. *ACM Computing Surveys (CSUR)*, 54(7):1–37, 2021.
- I. Galil, M. Dabbah, and R. El-Yaniv. A framework for benchmarking class-out-of-distribution detection and its application to imagenet. In *The Eleventh International Conference on Learning Representations*.
- Y. Geifman and R. El-Yaniv. Selectivenet: A deep neural network with an integrated reject option. In *International conference on machine learning*, pages 2151–2159. PMLR, 2019.
- C. Guo, G. Pleiss, Y. Sun, and K. Q. Weinberger. On calibration of modern neural networks. In *ICML*, 2017.
- K. He, X. Zhang, S. Ren, and J. Sun. Deep residual learning for image recognition. In *Proceedings of the IEEE conference on computer vision and pattern recognition*, pages 770–778, 2016.
- D. Hendrycks and K. Gimpel. A baseline for detecting misclassified and out-of-distribution examples in neural networks. In *International Conference on Learning Representations*, 2022.

- 443 D. Hendrycks, M. Mazeika, and T. Dietterich. Deep anomaly detection with outlier exposure. In  
444 *International Conference on Learning Representations*, 2019. URL [https://openreview.net/  
445 forum?id=HyxCxhRcY7](https://openreview.net/forum?id=HyxCxhRcY7).
- 446 R. Huang and Y. Li. Mos: Towards scaling out-of-distribution detection for large semantic space. In  
447 *Proceedings of the IEEE/CVF Conference on Computer Vision and Pattern Recognition*, pages  
448 8710–8719, 2021.
- 449 S. Joshi, A. Jain, A. Payani, and B. Mirzasoleiman. Data-efficient contrastive language-image  
450 pretraining: Prioritizing data quality over quantity. In *International Conference on Artificial  
451 Intelligence and Statistics*, pages 1000–1008. PMLR, 2024.
- 452 P. Khosla, P. Teterwak, C. Wang, A. Sarna, Y. Tian, P. Isola, A. Maschinot, C. Liu, and D. Krishnan.  
453 Supervised contrastive learning. *Advances in neural information processing systems*, 33:18661–  
454 18673, 2020.
- 455 A. Krizhevsky. *Learning multiple layers of features from tiny images*. Technical report, University of  
456 Toronto, 2009.
- 457 LAION. Clip-vit-h-14-laion2b-s32b-b79k. [https://huggingface.co/laion/  
458 CLIP-ViT-H-14-laion2B-s32B-b79K](https://huggingface.co/laion/CLIP-ViT-H-14-laion2B-s32B-b79K).
- 459 B. Lakshminarayanan, A. Pritzel, and C. Blundell. Simple and scalable predictive uncertainty  
460 estimation using deep ensembles. *NeurIPS*, 2017.
- 461 K. Lee, H. Lee, K. Lee, and J. Shin. Training confidence-calibrated classifiers for detecting out-of-  
462 distribution samples. In *International Conference on Learning Representations*, 2018.
- 463 S. Liang, Y. Li, and R. Srikant. Enhancing the reliability of out-of-distribution image detection in  
464 neural networks. In *6th International Conference on Learning Representations, ICLR 2018*, 2018.
- 465 L. Liu and Y. Qin. Fast decision boundary based out-of-distribution detector. In *Forty-first Interna-  
466 tional Conference on Machine Learning*, 2024. URL [https://openreview.net/forum?id=  
467 eQa0b4r6YC](https://openreview.net/forum?id=eQa0b4r6YC).
- 468 W. Liu, X. Wang, J. Owens, and Y. Li. Energy-based out-of-distribution detection. *Advances in  
469 neural information processing systems*, 33:21464–21475, 2020.
- 470 Z. Liu, Y. Lin, Y. Cao, H. Hu, Y. Wei, Z. Zhang, S. Lin, and B. Guo. Swin transformer: Hierar-  
471 chical vision transformer using shifted windows. In *Proceedings of the IEEE/CVF international  
472 conference on computer vision*, pages 10012–10022, 2021.
- 473 Z. Liu, H. Mao, C.-Y. Wu, C. Feichtenhofer, T. Darrell, and S. Xie. A convnet for the 2020s. In  
474 *Proceedings of the IEEE/CVF conference on computer vision and pattern recognition*, pages  
475 11976–11986, 2022.
- 476 A. Malinin and M. Gales. Predictive uncertainty estimation via prior networks. *Advances in neural  
477 information processing systems*, 31, 2018.
- 478 A. Meinke and M. Hein. Towards neural networks that provably know when they don’t know. In  
479 *International Conference on Learning Representations*, 2020. URL [https://openreview.net/  
480 forum?id=ByxGkySKwH](https://openreview.net/forum?id=ByxGkySKwH).
- 481 M. Minderer, J. Djolonga, R. Romijnders, F. Hubis, X. Zhai, N. Houlsby, D. Tran, and M. Lucic.  
482 Revisiting the calibration of modern neural networks. *NeurIPS*, 2021.
- 483 Y. Ming, Y. Fan, and Y. Li. Poem: Out-of-distribution detection with posterior sampling. In  
484 *International Conference on Machine Learning*, pages 15650–15665. PMLR, 2022.
- 485 L. Moschella, V. Maiorca, M. Fumero, A. Norelli, F. Locatello, and E. Rodolà. Relative representa-  
486 tions enable zero-shot latent space communication. In *The Eleventh International Conference on  
487 Learning Representations*, 2023. URL <https://openreview.net/forum?id=SrC-nwieGJ>.

488 Y. Netzer, T. Wang, A. Coates, A. Bissacco, B. Wu, A. Y. Ng, et al. Reading digits in natural images  
489 with unsupervised feature learning. In *NIPS workshop on deep learning and unsupervised feature*  
490 *learning*, volume 2011, page 4. Granada, 2011.

491 J. Park, Y. G. Jung, and A. B. J. Teoh. Nearest neighbor guidance for out-of-distribution detection.  
492 In *Proceedings of the IEEE/CVF international conference on computer vision*, pages 1686–1695,  
493 2023.

494 A. Paszke, S. Gross, F. Massa, A. Lerer, J. Bradbury, G. Chanan, T. Killeen, Z. Lin, N. Gimelshein,  
495 L. Antiga, et al. Pytorch: An imperative style, high-performance deep learning library. *Advances*  
496 *in neural information processing systems*, 32, 2019.

497 B. Peng, Y. Luo, Y. Zhang, Y. Li, and Z. Fang. Conjnorm: Tractable density estimation for out-of-  
498 distribution detection. In *The Twelfth International Conference on Learning Representations*, 2024.  
499 URL <https://openreview.net/forum?id=1pSL2cXWoz>.

500 A. Radford, J. W. Kim, C. Hallacy, A. Ramesh, G. Goh, S. Agarwal, G. Sastry, A. Askell, P. Mishkin,  
501 J. Clark, et al. Learning transferable visual models from natural language supervision. In  
502 *International conference on machine learning*, pages 8748–8763. PmLR, 2021.

503 J. Ren, S. Fort, J. Liu, A. G. Roy, S. Padhy, and B. Lakshminarayanan. A simple fix to mahalanobis  
504 distance for improving near-ood detection. *arXiv preprint arXiv:2106.09022*, 2021.

505 M. Sandler, A. Howard, M. Zhu, A. Zhmoginov, and L.-C. Chen. Mobilenetv2: Inverted residuals  
506 and linear bottlenecks. In *Proceedings of the IEEE conference on computer vision and pattern*  
507 *recognition*, pages 4510–4520, 2018.

508 V. Sehwag, M. Chiang, and P. Mittal. Ssd: A unified framework for self-supervised outlier detection.  
509 In *International Conference on Learning Representations*, 2021.

510 Y. Sun, C. Guo, and Y. Li. React: Out-of-distribution detection with rectified activations. In  
511 A. Beygelzimer, Y. Dauphin, P. Liang, and J. W. Vaughan, editors, *Advances in Neural Information*  
512 *Processing Systems*, 2021. URL [https://openreview.net/forum?id=IBVBtz\\_sRSm](https://openreview.net/forum?id=IBVBtz_sRSm).

513 Y. Sun, Y. Ming, X. Zhu, and Y. Li. Out-of-distribution detection with deep nearest neighbors. In  
514 *International Conference on Machine Learning*, pages 20827–20840. PMLR, 2022.

515 J. Tack, S. Mo, J. Jeong, and J. Shin. Csi: Novelty detection via contrastive learning on distributionally  
516 shifted instances. *Advances in neural information processing systems*, 33:11839–11852, 2020.

517 H. Touvron, M. Cord, M. Douze, F. Massa, A. Sablayrolles, and H. Jégou. Training data-efficient  
518 image transformers & distillation through attention. In *International conference on machine*  
519 *learning*, pages 10347–10357. PMLR, 2021.

520 J. Van Amersfoort, L. Smith, Y. W. Teh, and Y. Gal. Uncertainty estimation using a single deep  
521 deterministic neural network. In *International conference on machine learning*, pages 9690–9700.  
522 PMLR, 2020.

523 G. Van Horn, O. Mac Aodha, Y. Song, Y. Cui, C. Sun, A. Shepard, H. Adam, P. Perona, and  
524 S. Belongie. The inaturalist species classification and detection dataset. In *Proceedings of the*  
525 *IEEE conference on computer vision and pattern recognition*, pages 8769–8778, 2018.

526 S. Vaze, K. Han, A. Vedaldi, and A. Zisserman. Open-set recognition: A good closed-set classifier is  
527 all you need? In *International Conference on Learning Representations (ICLR)*, 2022.

528 H. Wei, R. Xie, H. Cheng, L. Feng, B. An, and Y. Li. Mitigating neural network overconfidence with  
529 logit normalization. In *International conference on machine learning*, pages 23631–23644. PMLR,  
530 2022.

531 R. Wightman. Pytorch image models. [https://github.com/huggingface/](https://github.com/huggingface/pytorch-image-models)  
532 [pytorch-image-models](https://github.com/huggingface/pytorch-image-models), 2020. Accessed: 2025-05-20.

533 J. Xiao, J. Hays, K. A. Ehinger, A. Oliva, and A. Torralba. Sun database: Large-scale scene  
534 recognition from abbey to zoo. In *2010 IEEE computer society conference on computer vision and*  
535 *pattern recognition*, pages 3485–3492. IEEE, 2010.

- 536 C. Xu, F. Yu, Z. Xu, N. Inkawhich, and X. Chen. Out-of-distribution detection via deep multi-  
537 comprehension ensemble. In *Forty-first International Conference on Machine Learning*, 2024a.
- 538 K. Xu, R. Chen, G. Franchi, and A. Yao. Scaling for training time and post-hoc out-of-distribution  
539 detection enhancement. In *The Twelfth International Conference on Learning Representations*,  
540 2024b. URL <https://openreview.net/forum?id=RDSTjtnqCg>.
- 541 P. Xu, K. A. Ehinger, Y. Zhang, A. Finkelstein, S. R. Kulkarni, and J. Xiao. Turkergaze: Crowdsourc-  
542 ing saliency with webcam based eye tracking. *arXiv preprint arXiv:1504.06755*, 2015.
- 543 F. Xue, Z. He, Y. Zhang, C. Xie, Z. Li, and F. Tan. Enhancing the power of ood detection via  
544 sample-aware model selection. In *Proceedings of the IEEE/CVF Conference on Computer Vision*  
545 *and Pattern Recognition*, pages 17148–17157, 2024.
- 546 J. Yang, K. Zhou, Y. Li, and Z. Liu. Generalized out-of-distribution detection: A survey. *International*  
547 *Journal of Computer Vision*, pages 1–28, 2024.
- 548 B. Zhou, A. Lapedriza, A. Khosla, A. Oliva, and A. Torralba. Places: A 10 million image database  
549 for scene recognition. *IEEE transactions on pattern analysis and machine intelligence*, 40(6):  
550 1452–1464, 2017.

Table 8: ORA achieves state-of-the-art performance on CIFAR-10 OOD benchmark. Evaluated on ResNet-18 with FPR95 and AUROC.  $\uparrow$  indicates that larger values are better and vice versa. Best performance highlighted in **bold**. Methods with \* are hyperparameter-free.

| Method                              | SVHN               |                  | iSUN               |                  | Place365           |                  | Texture            |                  | Avg                |                  |
|-------------------------------------|--------------------|------------------|--------------------|------------------|--------------------|------------------|--------------------|------------------|--------------------|------------------|
|                                     | FPR95 $\downarrow$ | AUROC $\uparrow$ |
| <i>Without Contrastive Learning</i> |                    |                  |                    |                  |                    |                  |                    |                  |                    |                  |
| MSP *                               | 59.51              | 91.29            | 54.57              | 92.12            | 62.55              | 88.63            | 66.49              | 88.50            | 60.78              | 90.14            |
| ODIN                                | 61.71              | 89.12            | 15.09              | 97.37            | 41.45              | 91.85            | 52.62              | 89.41            | 42.72              | 91.94            |
| Energy *                            | 53.96              | 91.32            | 27.52              | 95.59            | 42.80              | 91.03            | 55.23              | 89.37            | 44.88              | 91.83            |
| ViM                                 | 25.38              | 95.40            | 30.52              | 95.10            | 47.36              | 90.68            | 25.69              | 95.01            | 32.24              | 94.05            |
| MDS                                 | 16.77              | 95.67            | 7.56               | 97.93            | 85.87              | 68.44            | 35.21              | 85.90            | 36.35              | 86.99            |
| <i>With Contrastive Learning</i>    |                    |                  |                    |                  |                    |                  |                    |                  |                    |                  |
| CSI                                 | 37.38              | 94.69            | 10.36              | 98.01            | 38.31              | 93.04            | 28.85              | 94.87            | 28.73              | 95.15            |
| SSD+                                | 1.35               | 99.72            | 33.60              | 95.16            | 26.09              | 95.48            | 12.98              | 97.70            | 18.51              | 97.02            |
| KNN+                                | 2.20               | 99.57            | 20.06              | 96.74            | 23.06              | 95.36            | 8.09               | 98.56            | 13.35              | 97.56            |
| fDBD *                              | 4.59               | 99.00            | 10.04              | 98.07            | 23.16              | 95.09            | 9.61               | 98.22            | 11.85              | 97.60            |
| ORA *                               | 3.53               | 99.16            | 8.36               | 98.28            | 23.40              | 94.88            | 8.58               | 98.34            | <b>10.97</b>       | <b>97.67</b>     |

Table 9: ORA achieves state-of-the-art performance on ImageNet OOD benchmark. Evaluated on ResNet-50 with FPR95 and AUROC.  $\uparrow$  indicates that larger values are better and vice versa. Best performance highlighted in **bold**. Methods with \* are hyperparameter-free.

| Method                              | iNaturalist        |                  | SUN                |                  | Places             |                  | Texture            |                  | Avg                |                  |
|-------------------------------------|--------------------|------------------|--------------------|------------------|--------------------|------------------|--------------------|------------------|--------------------|------------------|
|                                     | FPR95 $\downarrow$ | AUROC $\uparrow$ |
| <i>Without Contrastive Learning</i> |                    |                  |                    |                  |                    |                  |                    |                  |                    |                  |
| MSP *                               | 54.99              | 87.74            | 70.83              | 80.63            | 73.99              | 79.76            | 68.00              | 79.61            | 66.95              | 81.99            |
| ODIN                                | 47.66              | 89.66            | 60.15              | 84.59            | 67.90              | 81.78            | 50.23              | 85.62            | 56.48              | 85.41            |
| Energy *                            | 55.72              | 89.95            | 59.26              | 85.89            | 64.92              | 82.86            | 53.72              | 85.99            | 58.41              | 86.17            |
| ViM                                 | 71.85              | 87.42            | 81.79              | 81.07            | 83.12              | 78.40            | 14.88              | 96.83            | 62.91              | 85.93            |
| MDS                                 | 97.00              | 52.65            | 98.50              | 42.41            | 98.40              | 41.79            | 55.80              | 85.01            | 87.43              | 55.17            |
| <i>With Contrastive Learning</i>    |                    |                  |                    |                  |                    |                  |                    |                  |                    |                  |
| SSD+                                | 57.16              | 87.77            | 78.23              | 73.10            | 81.19              | 70.97            | 36.37              | 88.53            | 63.24              | 80.09            |
| KNN+                                | 30.18              | 94.89            | 48.99              | 88.63            | 59.15              | 84.71            | 15.55              | 95.40            | 38.47              | 90.91            |
| fDBD *                              | 17.27              | 96.68            | 42.30              | 90.90            | 49.77              | 88.36            | 21.83              | 95.43            | 32.78              | 92.86            |
| ORA *                               | 12.27              | 97.42            | 31.80              | 92.85            | 40.71              | 90.10            | 15.39              | 96.68            | <b>25.04</b>       | <b>94.26</b>     |

## A Additional Results

### A.1 OOD Detection on CIFAR-10 and ImageNet Benchmarks

Table 8 and Table 9 shows the performance of ORA along with the 9 baselines on CIFAR-10 and ImageNet OOD Benchmarks, respectively. All the baselines on CIFAR-10 use ResNet-18 architecture and on ImageNet use ResNet-50. Our proposed method reaches *state-of-the-art* performance on both benchmarks, reducing the FPR95 on average by 7.74% on Imagenet and 0.88% on CIFAR10. In the following, we provide a detailed analysis of these results.

**ORA continues to show the success of distance-based methods over logit-based methods.** Logit-based scoring methods MSP Hendrycks and Gimpel [2022], Energy Liu et al. [2020] are one of the earliest baselines proving their success on measuring model’s confidences. MSP measures the maximum softmax probability as its score while Energy does a logsumexp operation on the logits. Recent distance-based methods like KNN+ Sun et al. [2022] and fDBD Liu and Qin [2024] outperforms the early logit-based ones. Similarly, ORA achieves significantly better performance on both benchmarks, reducing the FPR95 up to 49.81% and 41.91% while improving the AUROC up to 7.53% and 12.27% on CIFAR-10 and ImageNet OOD benchmarks.

**ORA improves on the recent success of methods using contrastively learned features.** Table 8 and 9 show the success of recent methods CSI Tack et al. [2020], SSD+ Schwag et al. [2021], KNN+ Sun et al. [2022] and fDBD Liu and Qin [2024] that utilizes contrastively learned representations over the ones those do not use. We observe that the additional structure the supervised contrastive loss puts on the feature representations are particularly beneficial to the distance-based methods. ORA also benefits from more structured representations on the feature space, as it explores the relationship between the representation and the decision boundaries. Notably, ORA improves both of the metrics on both CIFAR-10 and ImageNet benchmarks, achieving the state-of-the-art performance.

## 574 A.2 Comparison with ReAct

575 Tables 10 and 11 compare the performance of ORA with the activation shaping method ReAct Sun  
 576 et al. [2021]. ORA improves FPR95 by 1.11% on CIFAR10 and 6.39% on ImageNet. Additionally,  
 577 combining ORA with ReAct further enhances performance on both benchmarks across both metrics,  
 578 FPR95 and AUROC.

Table 10: ORA vs ReAct under ImageNet OOD benchmark.

| Method      | iNaturalist |        | SUN    |        | Places |        | Texture |        | Avg          |              |
|-------------|-------------|--------|--------|--------|--------|--------|---------|--------|--------------|--------------|
|             | FPR95↓      | AUROC↑ | FPR95↓ | AUROC↑ | FPR95↓ | AUROC↑ | FPR95↓  | AUROC↑ | FPR95↓       | AUROC↑       |
| ReAct       | 20.38       | 96.22  | 24.20  | 94.20  | 33.85  | 91.58  | 47.30   | 89.80  | 31.43        | 92.95        |
| ORA         | 12.27       | 97.42  | 31.80  | 92.85  | 40.71  | 90.10  | 15.39   | 96.68  | 25.04        | 94.26        |
| ORA w/ReAct | 11.13       | 97.79  | 22.34  | 94.95  | 33.33  | 91.81  | 14.65   | 96.60  | <b>20.36</b> | <b>96.29</b> |

Table 11: ORA vs ReAct under CIFAR OOD benchmark.

| Method      | SVHN   |        | iSUN   |        | Places |        | Texture |        | Avg          |              |
|-------------|--------|--------|--------|--------|--------|--------|---------|--------|--------------|--------------|
|             | FPR95↓ | AUROC↑ | FPR95↓ | AUROC↑ | FPR95↓ | AUROC↑ | FPR95↓  | AUROC↑ | FPR95↓       | AUROC↑       |
| ReAct       | 6.15   | 98.75  | 10.31  | 98.09  | 21.68  | 95.47  | 10.18   | 98.12  | 12.08        | 97.61        |
| ORA         | 3.53   | 99.16  | 8.36   | 98.28  | 23.40  | 94.88  | 8.58    | 98.34  | 10.97        | 97.67        |
| ORA w/ReAct | 3.35   | 99.18  | 8.11   | 98.29  | 20.84  | 95.25  | 7.87    | 98.45  | <b>10.04</b> | <b>97.79</b> |

## 579 A.3 Centering with Different Statistics

580 Tables 12 and 13 present the performance of the ORA score when using different class means as the  
 581 reference view instead of the mean of ID features. We also explored alternative centering strategies  
 582 by replacing the mean of ID features with elementwise operations—max, min, and median—where  
 583 each corresponds to using the respective statistic before calculating angles. Additionally, sum  
 584 aggregation refers to summing scores obtained from individual class mean reference points or  
 585 from these elementwise operations. Results indicate that using  $\mu_{ID}$  consistently outperforms these  
 586 alternatives.

Table 12: CIFAR10 centering with different statistics using ResNet18 model.

| Method             | SVHN   |        | iSUN   |        | Places |        | Texture |        | Avg          |              |
|--------------------|--------|--------|--------|--------|--------|--------|---------|--------|--------------|--------------|
|                    | FPR95↓ | AUROC↑ | FPR95↓ | AUROC↑ | FPR95↓ | AUROC↑ | FPR95↓  | AUROC↑ | FPR95↓       | AUROC↑       |
| Class 0 mean       | 4.77   | 98.96  | 8.06   | 98.27  | 25.20  | 94.62  | 10.11   | 98.19  | 12.03        | 97.51        |
| Class 1 mean       | 6.12   | 98.77  | 8.86   | 98.24  | 24.94  | 94.96  | 13.16   | 97.68  | 13.27        | 97.41        |
| Class 2 mean       | 5.42   | 98.84  | 7.90   | 98.36  | 22.19  | 95.58  | 11.42   | 97.98  | 11.73        | 97.69        |
| Class 3 mean       | 5.94   | 98.76  | 7.99   | 98.29  | 22.80  | 95.43  | 11.35   | 97.66  | 12.02        | 97.54        |
| Class 4 mean       | 5.44   | 98.85  | 8.87   | 98.22  | 22.68  | 95.47  | 11.26   | 97.96  | 12.06        | 97.63        |
| Class 5 mean       | 6.22   | 98.64  | 7.38   | 98.45  | 23.11  | 95.48  | 11.84   | 97.82  | 12.14        | 97.60        |
| Class 6 mean       | 5.74   | 98.82  | 8.50   | 98.26  | 97.67  | 20.76  | 12.11   | 95.73  | 11.78        | 97.62        |
| Class 7 mean       | 5.93   | 98.78  | 8.29   | 98.30  | 24.55  | 95.13  | 12.57   | 97.82  | 12.84        | 97.51        |
| Class 8 mean       | 5.81   | 98.81  | 10.03  | 97.95  | 26.79  | 94.18  | 10.41   | 98.11  | 13.26        | 97.26        |
| Class 9 mean       | 6.11   | 98.78  | 9.00   | 98.19  | 24.89  | 94.62  | 11.35   | 97.95  | 12.84        | 97.25        |
| Sum aggregation    | 5.68   | 98.85  | 8.27   | 98.33  | 23.70  | 95.34  | 11.33   | 97.98  | 12.25        | 97.62        |
| Elementwise max    | 6.28   | 98.73  | 8.28   | 98.30  | 13.79  | 97.57  | 24.35   | 95.21  | 13.18        | 97.45        |
| Elementwise min    | 3.60   | 99.14  | 14.82  | 97.10  | 9.38   | 97.99  | 27.62   | 92.97  | 13.85        | 96.80        |
| Elementwise median | 2.33   | 99.34  | 10.02  | 97.90  | 7.73   | 98.29  | 23.99   | 93.84  | 11.02        | 97.34        |
| Sum aggregation    | 5.78   | 98.65  | 20.31  | 95.64  | 10.35  | 97.80  | 30.42   | 91.60  | 16.72        | 95.92        |
| ORA                | 3.53   | 99.16  | 8.36   | 98.28  | 23.40  | 94.88  | 8.58    | 98.34  | <b>10.97</b> | <b>97.67</b> |

Table 13: ImageNet centering with different statistics using ResNet50 model.

| Method             | iNaturalist |        | SUN    |        | Places |        | Texture |        | Avg          |              |
|--------------------|-------------|--------|--------|--------|--------|--------|---------|--------|--------------|--------------|
|                    | FPR95↓      | AUROC↑ | FPR95↓ | AUROC↑ | FPR95↓ | AUROC↑ | FPR95↓  | AUROC↑ | FPR95↓       | AUROC↑       |
| Class 1 mean       | 16.01       | 96.92  | 31.63  | 92.52  | 39.86  | 90.67  | 25.39   | 93.33  | 28.22        | 93.36        |
| Class 250 mean     | 11.48       | 97.65  | 31.20  | 92.69  | 39.53  | 90.77  | 20.16   | 94.87  | 25.59        | 93.99        |
| Class 500 mean     | 14.87       | 97.08  | 38.97  | 90.52  | 45.80  | 88.90  | 26.29   | 93.04  | 31.48        | 92.28        |
| Class 750 mean     | 11.57       | 97.59  | 34.23  | 92.13  | 42.60  | 90.15  | 19.75   | 95.18  | 27.04        | 93.76        |
| Class 1000 mean    | 11.36       | 97.63  | 30.20  | 93.01  | 38.12  | 91.08  | 19.31   | 95.31  | <b>24.75</b> | <b>94.26</b> |
| Sum aggregation    | 12.40       | 97.48  | 32.47  | 92.36  | 40.42  | 90.53  | 21.38   | 94.52  | 26.67        | 93.72        |
| Elementwise Max    | 17.10       | 96.76  | 34.22  | 91.73  | 41.88  | 90.14  | 35.09   | 89.84  | 32.07        | 92.12        |
| Elementwise Min    | 29.16       | 94.51  | 60.70  | 85.81  | 65.01  | 83.18  | 22.84   | 95.07  | 44.43        | 89.64        |
| Elementwise Median | 20.04       | 95.83  | 46.66  | 89.15  | 54.42  | 85.61  | 15.04   | 96.81  | 34.04        | 91.85        |
| Sum aggregation    | 21.09       | 95.89  | 49.47  | 88.97  | 56.50  | 86.12  | 17.62   | 95.98  | 36.17        | 91.74        |
| ORA                | 12.27       | 97.42  | 31.80  | 92.85  | 40.71  | 90.10  | 15.39   | 96.68  | 25.04        | <b>94.26</b> |

#### A.4 Resource Constrained Setting

Table 14 presents the performance of ORA in a resource-constrained setting using MobileNetV2 Sandler et al. [2018], a model designed for efficient inference with minimal resources. ORA achieves the best average performance, improving FPR and AUROC by 7.56% and 1.66%, respectively, demonstrating its adaptability to resource-limited scenarios.

Table 14: Resource Constrained Setting: ImageNet MobileNet\_v2 performances.

| Method | iNaturalist |        | SUN    |        | Places |        | Texture |        | Avg          |              |
|--------|-------------|--------|--------|--------|--------|--------|---------|--------|--------------|--------------|
|        | FPR95↓      | AUROC↑ | FPR95↓ | AUROC↑ | FPR95↓ | AUROC↑ | FPR95↓  | AUROC↑ | FPR95↓       | AUROC↑       |
| MSP    | 59.84       | 86.71  | 74.15  | 78.87  | 76.84  | 78.14  | 70.98   | 78.95  | 70.45        | 80.67        |
| Energy | 55.35       | 90.33  | 59.36  | 86.24  | 66.28  | 83.21  | 54.54   | 86.58  | 58.88        | 86.59        |
| KNN    | 85.92       | 72.67  | 90.51  | 65.39  | 93.21  | 60.08  | 14.04   | 96.98  | 70.92        | 73.78        |
| fDBD   | 53.72       | 90.89  | 68.22  | 82.84  | 73.20  | 80.09  | 37.82   | 91.85  | 58.24        | 86.42        |
| ORA    | 46.59       | 91.86  | 61.21  | 85.01  | 67.81  | 82.08  | 27.07   | 94.04  | <b>50.68</b> | <b>88.25</b> |

## B Implementation Details

We used Pytorch [Paszke et al., 2019] to conduct our experiments. We obtain the checkpoints of pretrained models ResNet18 with supervised contrastive loss and ResNet50 with supervised contrastive loss from Liu and Qin [2024]’s work for a fair comparison. In the experiment where we aggregate different models’ confidences, ViT-B/16 [Dosovitskiy et al., 2020] checkpoint is retrieved from the publicly available repository <https://github.com/lukemelas/PyTorch-Pretrained-ViT/tree/master>. In the experiment where we merge ORA with the activation shaping algorithms ASH [Djurisic et al., 2023], Scale [Xu et al., 2024b] and ReAct [Sun et al., 2021], we used the percentiles to set the thresholds 35, 90 and 80 respectively. For the extended results on Table 1, we used the timm [Wightman, 2020] checkpoints for the models ConvNeXt [Liu et al., 2022], Swin [Liu et al., 2021], DeiT [Touvron et al., 2021] and EVA [Fang et al., 2023]. Similarly, for the CLIP experiments on Table 3, we used the huggingface checkpoint of CLIP ViT-H/14 [LAION]. All experiments are evaluated on a single Nvidia H100 GPU. Note that, thanks to our hyperparameter-free post-hoc score function, all experiments are deterministic given the pretrained model.

## C Robustness of the Relative Angles

In this section, we provide a theoretical justification for focusing on relative angles, rather than absolute distances, to better understand the robustness of representations under scaling transformations.

**Theorem:** Let  $M_1$  and  $M_2$  be two neural networks such that:

1. The encoder of  $M_2$  is a scaled version of the encoder of  $M_1$ . Specifically, there exists a positive scalar  $k \in \mathbb{R}_+$  such that the output of the penultimate layer of  $M_2$  satisfies:

$$\mathbf{z}^{M_2} = k \cdot \mathbf{z}^{M_1}$$

2. Both networks share the same final linear layer (without bias) for classification.

613 Since scaling transformations do not affect the softmax decision boundaries (due to monotonicity),  
 614  $M_1$  and  $M_2$  will produce the same classification decisions. Under this setup:

- 615 • The angles satisfy  $\theta_{y_1, y_2}(\mathbf{z}^{M_1}) = \theta_{y_1, y_2}(\mathbf{z}^{M_2})$ , where  $\theta_{y_1, y_2}(\mathbf{z})$  is the relative angle between  
 616 representation and its projection onto the decision boundary.
- 617 • However, the distances satisfy  $d_{y_1, y_2}(\mathbf{z}^{M_2}, \mathbf{z}_{db}^{M_2}) = k \cdot d_{y_1, y_2}(\mathbf{z}^{M_1}, \mathbf{z}_{db}^{M_1})$ , where  $d(\cdot, \cdot)$  is  
 618 the Euclidean distance.

619 **Proof:** Let  $\mathbf{z}^{M_1}$  be the penultimate layer representation of  $M_1$  and let  $\mathbf{z}_{db}^{M_1}$  denote the projection of  
 620  $\mathbf{z}^{M_1}$  onto the decision boundary between two classes  $y_1$  and  $y_2$ . Then following the Equation 1

$$\mathbf{z}_{db}^{M_1} = \mathbf{z}^{M_1} - \frac{(\mathbf{w}_{y_1} - \mathbf{w}_{y_2})^T \mathbf{z}^{M_1}}{\|\mathbf{w}_{y_1} - \mathbf{w}_{y_2}\|^2} (\mathbf{w}_{y_1} - \mathbf{w}_{y_2})$$

621 where  $\mathbf{w}_{y_1}$  and  $\mathbf{w}_{y_2}$  are the weight vectors corresponding to classes  $y_1$  and  $y_2$  in the shared linear  
 622 layer. For  $M_2$ , the features are scaled by  $k$ , so  $\mathbf{z}^{M_2} = k \cdot \mathbf{z}^{M_1}$ . Substituting into the projection  
 623 formula:

$$\begin{aligned} \mathbf{z}_{db}^{M_2} &= k \cdot \mathbf{z}^{M_1} - \frac{(\mathbf{w}_{y_1} - \mathbf{w}_{y_2})^T k \cdot \mathbf{z}^{M_1}}{\|\mathbf{w}_{y_1} - \mathbf{w}_{y_2}\|^2} (\mathbf{w}_{y_1} - \mathbf{w}_{y_2}) \\ \mathbf{z}_{db}^{M_2} &= k \cdot \mathbf{z}_{db}^{M_1} \end{aligned}$$

624 The angle is defined by the cosine similarity between the vectors  $\mathbf{z}^{M_1} - \mu_{ID}^{M_1}$  and  $\mathbf{z}_{db}^{M_1} - \mu_{ID}^{M_1}$ . Using  
 625 the substitutions  $\mathbf{z}^{M_2} = k \cdot \mathbf{z}^{M_1}$ ,  $\mathbf{z}_{db}^{M_2} = k \cdot \mathbf{z}_{db}^{M_1}$ , and  $\mu_{ID}^{M_2} = k \cdot \mu_{ID}^{M_1}$ , we have:

$$\begin{aligned} \cos(\theta_{y_1, y_2}(\mathbf{z}^{M_1})) &= \frac{\langle \mathbf{z}^{M_1} - \mu_{ID}^{M_1}, \mathbf{z}_{db}^{M_1} - \mu_{ID}^{M_1} \rangle}{\|\mathbf{z}^{M_1} - \mu_{ID}^{M_1}\| \cdot \|\mathbf{z}_{db}^{M_1} - \mu_{ID}^{M_1}\|} \\ &= \frac{k \cdot k \cdot \langle \mathbf{z}^{M_1} - \mu_{ID}^{M_1}, \mathbf{z}_{db}^{M_1} - \mu_{ID}^{M_1} \rangle}{k \cdot k \cdot \|\mathbf{z}^{M_1} - \mu_{ID}^{M_1}\| \cdot \|\mathbf{z}_{db}^{M_1} - \mu_{ID}^{M_1}\|} \\ &= \frac{\langle k \cdot \mathbf{z}^{M_1} - k \cdot \mu_{ID}^{M_1}, k \cdot \mathbf{z}_{db}^{M_1} - k \cdot \mu_{ID}^{M_1} \rangle}{\|k \cdot \mathbf{z}^{M_1} - k \cdot \mu_{ID}^{M_1}\| \cdot \|k \cdot \mathbf{z}_{db}^{M_1} - k \cdot \mu_{ID}^{M_1}\|} \\ &= \frac{\langle \mathbf{z}^{M_2} - \mu_{ID}^{M_2}, \mathbf{z}_{db}^{M_2} - \mu_{ID}^{M_2} \rangle}{\|\mathbf{z}^{M_2} - \mu_{ID}^{M_2}\| \cdot \|\mathbf{z}_{db}^{M_2} - \mu_{ID}^{M_2}\|} \\ &= \cos(\theta_{y_1, y_2}(\mathbf{z}^{M_2})) \end{aligned}$$

626 On the other hand, the absolute distance between  $z$  and  $z_{db}$  scale as follows:

$$\begin{aligned} d_{y_1, y_2}(\mathbf{z}^{M_2}, \mathbf{z}_{db}^{M_2}) &= d_{y_1, y_2}(k \cdot \mathbf{z}^{M_1}, k \cdot \mathbf{z}_{db}^{M_1}) \\ &= k \cdot d_{y_1, y_2}(\mathbf{z}^{M_1}, \mathbf{z}_{db}^{M_1}) \end{aligned}$$

627 Therefore, for two networks  $M_1$  and  $M_2$  with identical performance, we demonstrate that relative  
 628 angles remain invariant to scaling, whereas absolute distances are sensitive to it. Given that ReLU  
 629 networks are commonly used in practice (where activations are unbounded), scale-invariant, angle-  
 630 based techniques provide a more robust and suitable approach for measuring confidence compared to  
 631 distance-based methods, especially when comparing the confidences of different models.

---

**Algorithm 1** ORA (OOD Detection with Relative Angles)

---

**Require:** Sample  $\mathbf{x}$ , Pretrained model  $f$ , Mean of the in-distribution features  $\mu_{\text{ID}}$ **Ensure:** OOD score  $s$ 

```
1: function ORA( $\mathbf{x}, f, \mu_{\text{ID}}$ )
2:    $\hat{y} \leftarrow \arg \max_{y \in \mathcal{Y}} f(\mathbf{x})$ 
3:    $\mathbf{z} = f_1 \circ \dots \circ f_{L-1}(\mathbf{x})$  ▷ penultimate layer features
4:    $score \leftarrow -\infty$ 
5:   for  $y' \in \mathcal{Y}$  and  $y' \neq \hat{y}$  do ▷ for each other class
6:     compute  $\mathbf{z}_{db}$  as in Eq. 1
7:     compute  $\theta_{\hat{y}, y'}(\mathbf{z})$  using Eq. 2
8:     compute  $\tilde{s}(\mathbf{z})$  using Eq. 3
9:     if  $\tilde{s}(\mathbf{z}) \geq score$  then
10:        $score = \tilde{s}(\mathbf{z})$ 
11:     end if
12:   end for
13:   return  $score$  ▷ maximum score across classes
14: end function
```

---

632 **D Algorithm Box**

633 We present the pseudocode for ORA in Algorithm Box 1. It depicts how ORA assigns a score given a  
634 sample  $x$ , pretrained model  $f$ , and the ID statistics, mean of the in-distribution features  $\mu_{\text{ID}}$ .

635 **E Detailed Tables and Figures**

Table 15: Extended version for the model ensemble experiment presented on Table 4. ORA can be used as a score function to accumulate different architectures’ confidences due to its scale-invariance property. Evaluated under both ImageNet OOD benchmark. Best performance highlighted in **bold**.

| Method                 | iNaturalist |        | SUN    |        | Places |        | Texture |        | Avg          |              |
|------------------------|-------------|--------|--------|--------|--------|--------|---------|--------|--------------|--------------|
|                        | FPR95↓      | AUROC↑ | FPR95↓ | AUROC↑ | FPR95↓ | AUROC↑ | FPR95↓  | AUROC↑ | FPR95↓       | AUROC↑       |
| fDBD w/ResNet50        | 40.10       | 93.70  | 60.89  | 86.86  | 66.75  | 84.14  | 37.66   | 92.09  | 51.35        | 89.20        |
| fDBD w/ResNet50-supcon | 17.34       | 96.68  | 42.26  | 90.92  | 49.68  | 88.38  | 21.84   | 95.44  | 32.78        | 92.86        |
| fDBD w/ViT-B/16        | 12.97       | 97.71  | 51.09  | 89.67  | 56.51  | 87.32  | 45.62   | 89.48  | 41.55        | 91.05        |
| ORA w/ResNet50         | 34.88       | 94.43  | 54.30  | 88.41  | 61.79  | 85.64  | 27.34   | 94.24  | 44.58        | 90.68        |
| ORA w/ResNet50-supcon  | 12.27       | 97.42  | 31.80  | 92.85  | 40.71  | 90.10  | 15.39   | 96.68  | 25.04        | 94.26        |
| ORA w/ViT-B/16         | 11.81       | 97.85  | 48.98  | 90.06  | 54.60  | 87.75  | 44.31   | 89.85  | 39.92        | 91.38        |
| Ensemble fDBD          | 4.58        | 98.93  | 42.81  | 93.97  | 53.49  | 91.92  | 23.33   | 96.34  | 31.05        | 95.29        |
| Ensemble ORA           | 2.77        | 99.29  | 30.21  | 95.39  | 42.52  | 93.39  | 14.63   | 97.59  | <b>22.53</b> | <b>96.41</b> |

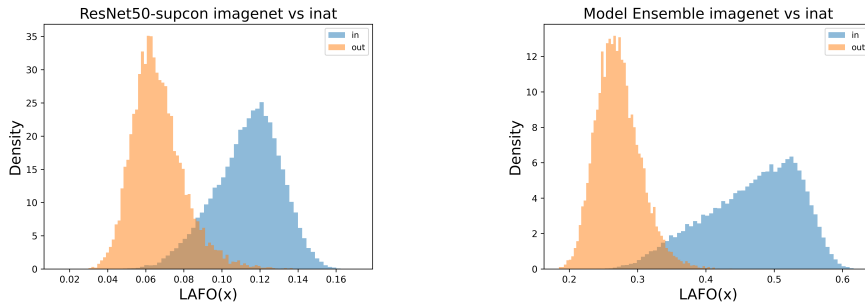

Figure 3: Comparison of the score histograms on Imagenet (ID) and inaturalist[Van Horn et al., 2018](OOD) of the best individual model (left) with the model ensemble (right). Model ensemble improves the ID and OOD separation.

Table 16: Extended version for the activation shaping experiment presented on Table 5. ORA can be used as a plug-in on top of activation shaping algorithms. Evaluated under ImageNet OOD benchmark.  $\uparrow$  indicates that larger values are better and vice versa. Best performance highlighted in **bold**.

| Method      | iNaturalist        |                  | SUN                |                  | Places             |                  | Texture            |                  | Avg                |                  |
|-------------|--------------------|------------------|--------------------|------------------|--------------------|------------------|--------------------|------------------|--------------------|------------------|
|             | FPR95 $\downarrow$ | AUROC $\uparrow$ |
| ORA w/ReLU  | 12.27              | 97.42            | 31.80              | 92.85            | 40.71              | 90.10            | 15.39              | 96.68            | 25.04              | 94.26            |
| ORA w/ASH   | 11.08              | 97.68            | 27.81              | 93.59            | 36.53              | 91.36            | 18.48              | 96.70            | 23.47              | 94.58            |
| ORA w/Scale | 14.65              | 97.05            | 25.43              | 94.02            | 36.21              | 90.78            | 17.07              | 95.65            | 23.34              | 94.37            |
| ORA w/ReAct | 11.13              | 97.79            | 22.34              | 94.95            | 33.33              | 91.81            | 14.65              | 96.60            | <b>20.36</b>       | <b>96.29</b>     |

## F Plain Model Performances

Tables 17, 18, and 19 show the performance of feature-based OOD methods on models trained without supervised contrastive loss. The results highlight that supervised contrastive loss significantly enhances feature quality, leading to a substantial performance boost for feature-based OOD methods.

Table 17: CIFAR10 Plain ResNet18 performances.

| Method | SVHN               |                  | iSUN               |                  | Places             |                  | Texture            |                  | Avg                |                  |
|--------|--------------------|------------------|--------------------|------------------|--------------------|------------------|--------------------|------------------|--------------------|------------------|
|        | FPR95 $\downarrow$ | AUROC $\uparrow$ |
| KNN    | 27.85              | 95.52            | 24.67              | 95.52            | 44.56              | 90.85            | 37.57              | 94.71            | 33.66              | 94.15            |
| fDBD   | 22.58              | 96.07            | 23.96              | 95.85            | 46.59              | 90.40            | 31.24              | 94.48            | 31.09              | 94.20            |
| ORA    | 22.09              | 96.02            | 22.91              | 95.90            | 46.46              | 90.37            | 31.28              | 94.48            | <b>30.86</b>       | <b>94.21</b>     |

Table 18: ImageNet Plain ResNet50 performances.

| Method | iNaturalist        |                  | SUN                |                  | Places             |                  | Texture            |                  | Avg                |                  |
|--------|--------------------|------------------|--------------------|------------------|--------------------|------------------|--------------------|------------------|--------------------|------------------|
|        | FPR95 $\downarrow$ | AUROC $\uparrow$ |
| KNN    | 59.00              | 86.47            | 68.82              | 80.72            | 76.28              | 75.76            | 11.77              | 97.07            | 53.97              | 85.01            |
| fDBD   | 40.24              | 93.67            | 60.60              | 86.97            | 66.40              | 84.27            | 37.50              | 92.12            | 51.19              | <b>89.26</b>     |
| ORA    | 38.94              | 93.68            | 59.78              | 86.53            | 66.89              | 83.04            | 31.67              | 93.33            | <b>49.32</b>       | 89.15            |

Table 19: ImageNet ViT performances.

| Method | iNaturalist        |                  | SUN                |                  | Places             |                  | Texture            |                  | Avg                |                  |
|--------|--------------------|------------------|--------------------|------------------|--------------------|------------------|--------------------|------------------|--------------------|------------------|
|        | FPR95 $\downarrow$ | AUROC $\uparrow$ |
| KNN    | 11.41              | 97.65            | 56.91              | 86.39            | 63.76              | 82.61            | 42.23              | 89.61            | 43.58              | 89.07            |
| fDBD   | 12.86              | 97.72            | 50.86              | 89.74            | 56.28              | 87.44            | 45.74              | 89.41            | 41.44              | 91.08            |
| ORA    | 11.80              | 97.86            | 48.81              | 90.14            | 54.32              | 87.88            | 44.56              | 89.75            | <b>39.87</b>       | <b>91.41</b>     |

## 640 G Histogram Plots for ID/OOD Separability

641 Figures 4 and 5 shows the score distributions on the Tables 8 and 9 respectively.

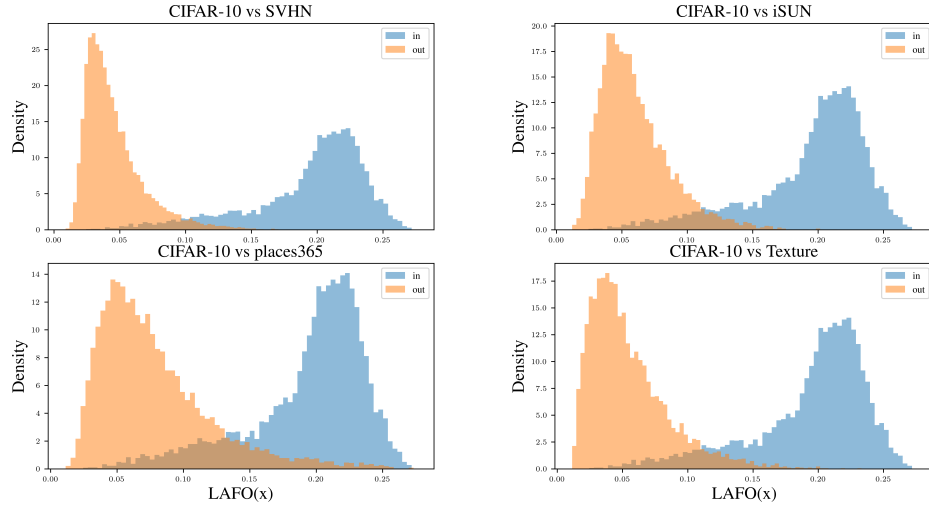

Figure 4: Score distributions of ID and OOD datasets in CIFAR-10 OOD Benchmark.

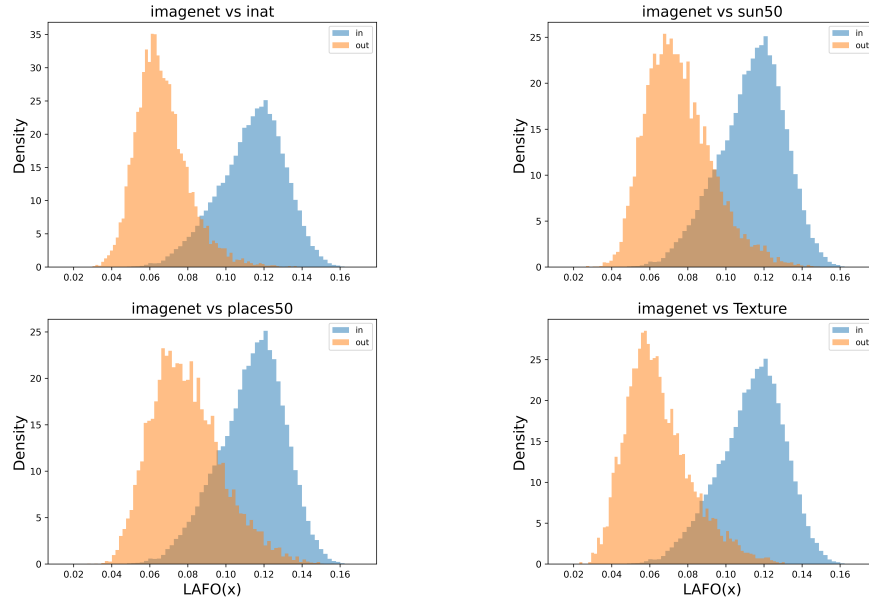

Figure 5: Score distributions of ID and OOD datasets in ImageNet OOD Benchmark.

## 642 H Comparison of Different Angles

643 Figure 6 presents the score distributions for different angles discussed in Section ?? . The results show  
 644 that  $\sin(\alpha)$  does not provide good ID/OOD separation, whereas  $\sin(\theta)$  and  $\sin(\theta)/\sin(\alpha)$  present  
 645 significantly clearer distinctions. Additionally, incorporating  $\sin(\alpha)$  into  $\sin(\theta)/\sin(\alpha)$  hinders its  
 646 performance compared to using  $\sin(\theta)$  alone.

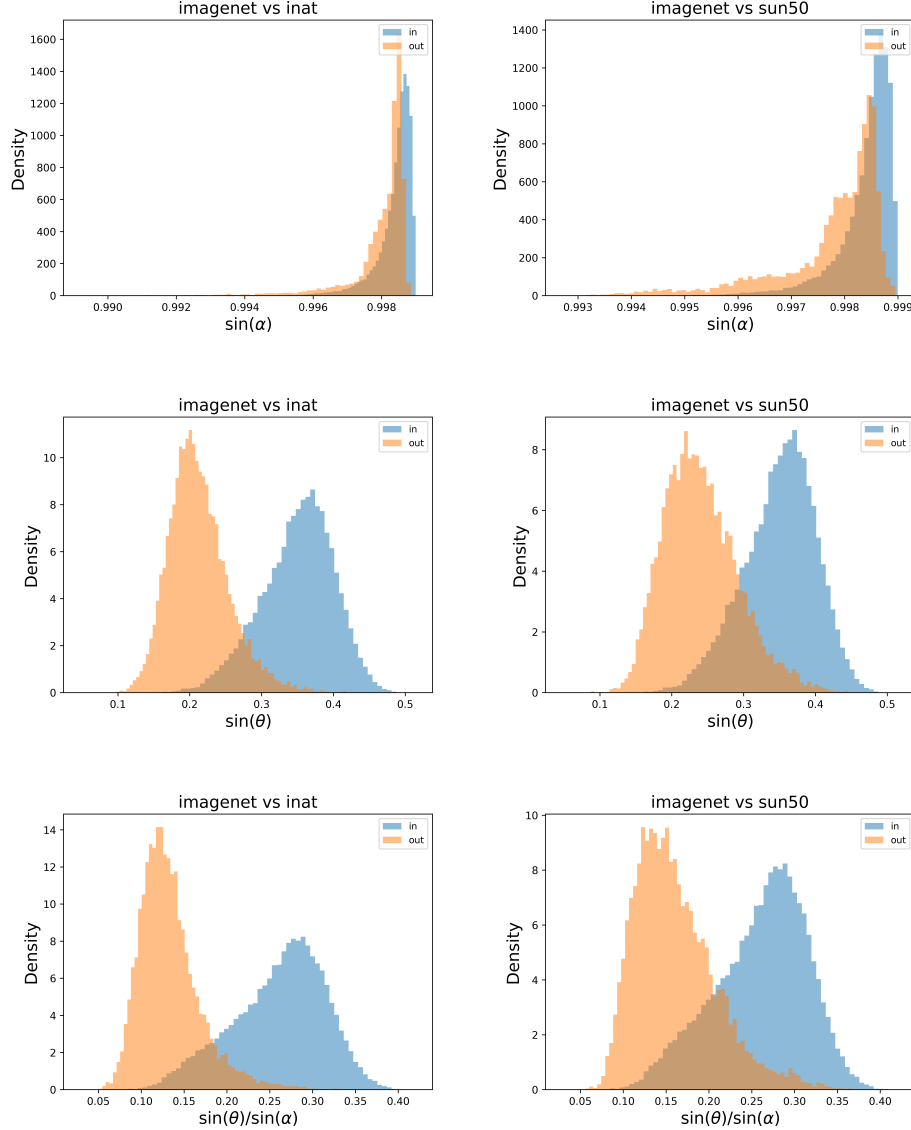

Figure 6: We demonstrate the ID/OOD separability of  $\sin(\alpha)$ ,  $\sin(\theta)$  and  $\frac{\sin(\theta)}{\sin(\alpha)}$ . Columns show the performances on iNaturalist and SUN datasets respectively. It can be seen that the ID/OOD class separability is the best when  $\sin(\theta)$  is used: considering  $\sin(\alpha)$  impedes the performance as confirmed quantitatively in terms of FPR95 and AUROC metrics in Table 9.

## I Near OOD Results

In Table 20, we report ORA’s FPR and AUROC on NINCO [Bitterwolf et al., 2023] and SSB-hard [Vaze et al., 2022] datasets, along with average scores and in-distribution (ID) classification accuracy.

**NINCO dataset:** We observe that models pretrained on ImageNet21k generally outperform their non-pretrained counterparts in terms of FPR95, consistent with the observations in Bitterwolf et al. [2023]. However, even with ORA, no single method referenced in Bitterwolf et al. [2023] dominates across all architectures. For example, ORA attains the best results on the plain ConvNeXt Liu et al. [2022] backbone, while Rcos [Bitterwolf et al., 2023] outperforms others on DeiT [Touvron et al., 2021] and ResNet50 [He et al., 2016]. Interestingly, Energy [Liu et al., 2020] performs best on Swin-pretrained [Liu et al., 2021].

**SSB-Hard dataset:** A similar trend is evident. ORA outperforms other methods on plain ConvNeXt [Liu et al., 2022] and offers strong performance on SWIN-pre [Liu et al., 2021], ConvNeXt-pre [Liu et al., 2022], and DeiT-pre [Touvron et al., 2021], where it outperforms Rcos [Bitterwolf et al., 2023], RMaha [Ren et al., 2021], and Pcos [Galil et al.]. However, it is worse than naive baselines like Energy [Liu et al., 2020] in certain pretrained settings. In contrast, for models without pre-training, naive methods degrade significantly while ORA remains on par with the top baselines.

These findings underscore a fundamental distinction between far- and near-OOD detection. Identifying completely novel inputs (as in far-OOD) is a fundamentally different problem from determining how much deviation is acceptable within or between known classes (as in near-OOD). Consequently, methods designed for detecting novelty or semantic outliers—such as those based on global uncertainty or energy scores—do not necessarily excel in near-OOD settings. This makes direct comparisons across these tasks potentially misleading. In near-OOD scenarios, where fine-grained class separation is critical, approaches that explicitly incorporate class-wise feature statistics—such as Rcos, Pcos, or RMah [Bitterwolf et al., 2023, Galil et al., Ren et al., 2021]—tend to have a clear advantage. These methods are better equipped to handle intra-class variance and subtle distributional shifts, highlighting the need for tailored evaluation and method design across OOD subtypes.

Table 20: OOD performance across benchmarks. FPR↓ and AUR↑ are reported for NINCO and SSB-Hard. The last two columns show the average performance and ID classification accuracy.

| Model         | NINCO |       | SSB-Hard |       | Average |       | ID Acc (%) |
|---------------|-------|-------|----------|-------|---------|-------|------------|
|               | FPR↓  | AUR↑  | FPR↓     | AUR↑  | FPR↓    | AUR↑  |            |
| ResNet-50     | 68.31 | 85.89 | 85.65    | 71.17 | 76.98   | 78.53 | 76.12      |
| ResNet-50-SCL | 54.39 | 86.50 | 79.09    | 71.35 | 66.74   | 78.93 | 77.31      |
| ConvNeXt      | 48.04 | 89.17 | 70.90    | 75.47 | 59.47   | 82.32 | 84.84      |
| ConvNeXt-pre  | 45.54 | 90.56 | 68.82    | 77.13 | 57.18   | 83.84 | 85.49      |
| DeiT          | 71.76 | 78.47 | 83.07    | 69.38 | 77.42   | 73.93 | 83.13      |
| DeiT-pre      | 60.07 | 86.40 | 80.40    | 72.40 | 70.24   | 79.40 | 84.79      |
| Swin          | 66.91 | 84.00 | 81.28    | 73.95 | 74.10   | 78.98 | 84.49      |
| Swin-pre      | 52.62 | 88.25 | 77.45    | 74.76 | 65.04   | 81.51 | 85.73      |
| EVA           | 46.61 | 88.15 | 67.86    | 75.65 | 57.24   | 81.90 | 87.88      |

## NeurIPS Paper Checklist

The checklist is designed to encourage best practices for responsible machine learning research, addressing issues of reproducibility, transparency, research ethics, and societal impact. Do not remove the checklist: **The papers not including the checklist will be desk rejected.** The checklist should follow the references and follow the (optional) supplemental material. The checklist does NOT count towards the page limit.

Please read the checklist guidelines carefully for information on how to answer these questions. For each question in the checklist:

- You should answer [Yes], [No], or [NA].
- [NA] means either that the question is Not Applicable for that particular paper or the relevant information is Not Available.
- Please provide a short (1–2 sentence) justification right after your answer (even for NA).

**The checklist answers are an integral part of your paper submission.** They are visible to the reviewers, area chairs, senior area chairs, and ethics reviewers. You will be asked to also include it (after eventual revisions) with the final version of your paper, and its final version will be published with the paper.

The reviewers of your paper will be asked to use the checklist as one of the factors in their evaluation. While "[Yes]" is generally preferable to "[No]", it is perfectly acceptable to answer "[No]" provided a proper justification is given (e.g., "error bars are not reported because it would be too computationally expensive" or "we were unable to find the license for the dataset we used"). In general, answering "[No]" or "[NA]" is not grounds for rejection. While the questions are phrased in a binary way, we acknowledge that the true answer is often more nuanced, so please just use your best judgment and write a justification to elaborate. All supporting evidence can appear either in the main paper or the supplemental material, provided in appendix. If you answer [Yes] to a question, in the justification please point to the section(s) where related material for the question can be found.

IMPORTANT, please:

- **Delete this instruction block, but keep the section heading “NeurIPS Paper Checklist”,**
- **Keep the checklist subsection headings, questions/answers and guidelines below.**
- **Do not modify the questions and only use the provided macros for your answers.**

### 1. Claims

Question: Do the main claims made in the abstract and introduction accurately reflect the paper’s contributions and scope?

Answer: [Yes]

Justification: Yes, the experiments in Section 4 back up our claims

Guidelines:

- The answer NA means that the abstract and introduction do not include the claims made in the paper.
- The abstract and/or introduction should clearly state the claims made, including the contributions made in the paper and important assumptions and limitations. A No or NA answer to this question will not be perceived well by the reviewers.
- The claims made should match theoretical and experimental results, and reflect how much the results can be expected to generalize to other settings.
- It is fine to include aspirational goals as motivation as long as it is clear that these goals are not attained by the paper.

### 2. Limitations

Question: Does the paper discuss the limitations of the work performed by the authors?

Answer: [Yes]

Justification: Yes, please see the section 5

Guidelines:

- The answer NA means that the paper has no limitation while the answer No means that the paper has limitations, but those are not discussed in the paper.
- The authors are encouraged to create a separate "Limitations" section in their paper.
- The paper should point out any strong assumptions and how robust the results are to violations of these assumptions (e.g., independence assumptions, noiseless settings, model well-specification, asymptotic approximations only holding locally). The authors should reflect on how these assumptions might be violated in practice and what the implications would be.
- The authors should reflect on the scope of the claims made, e.g., if the approach was only tested on a few datasets or with a few runs. In general, empirical results often depend on implicit assumptions, which should be articulated.
- The authors should reflect on the factors that influence the performance of the approach. For example, a facial recognition algorithm may perform poorly when image resolution is low or images are taken in low lighting. Or a speech-to-text system might not be used reliably to provide closed captions for online lectures because it fails to handle technical jargon.
- The authors should discuss the computational efficiency of the proposed algorithms and how they scale with dataset size.
- If applicable, the authors should discuss possible limitations of their approach to address problems of privacy and fairness.
- While the authors might fear that complete honesty about limitations might be used by reviewers as grounds for rejection, a worse outcome might be that reviewers discover limitations that aren't acknowledged in the paper. The authors should use their best judgment and recognize that individual actions in favor of transparency play an important role in developing norms that preserve the integrity of the community. Reviewers will be specifically instructed to not penalize honesty concerning limitations.

### 3. Theory assumptions and proofs

Question: For each theoretical result, does the paper provide the full set of assumptions and a complete (and correct) proof?

Answer: [\[Yes\]](#)

Justification: Please see the Appendix.

Guidelines:

- The answer NA means that the paper does not include theoretical results.
- All the theorems, formulas, and proofs in the paper should be numbered and cross-referenced.
- All assumptions should be clearly stated or referenced in the statement of any theorems.
- The proofs can either appear in the main paper or the supplemental material, but if they appear in the supplemental material, the authors are encouraged to provide a short proof sketch to provide intuition.
- Inversely, any informal proof provided in the core of the paper should be complemented by formal proofs provided in appendix or supplemental material.
- Theorems and Lemmas that the proof relies upon should be properly referenced.

### 4. Experimental result reproducibility

Question: Does the paper fully disclose all the information needed to reproduce the main experimental results of the paper to the extent that it affects the main claims and/or conclusions of the paper (regardless of whether the code and data are provided or not)?

Answer: [\[Yes\]](#)

Justification: Yes, please see the implementation details in the Appendix.

Guidelines:

- The answer NA means that the paper does not include experiments.

- If the paper includes experiments, a No answer to this question will not be perceived well by the reviewers: Making the paper reproducible is important, regardless of whether the code and data are provided or not.
- If the contribution is a dataset and/or model, the authors should describe the steps taken to make their results reproducible or verifiable.
- Depending on the contribution, reproducibility can be accomplished in various ways. For example, if the contribution is a novel architecture, describing the architecture fully might suffice, or if the contribution is a specific model and empirical evaluation, it may be necessary to either make it possible for others to replicate the model with the same dataset, or provide access to the model. In general, releasing code and data is often one good way to accomplish this, but reproducibility can also be provided via detailed instructions for how to replicate the results, access to a hosted model (e.g., in the case of a large language model), releasing of a model checkpoint, or other means that are appropriate to the research performed.
- While NeurIPS does not require releasing code, the conference does require all submissions to provide some reasonable avenue for reproducibility, which may depend on the nature of the contribution. For example
  - (a) If the contribution is primarily a new algorithm, the paper should make it clear how to reproduce that algorithm.
  - (b) If the contribution is primarily a new model architecture, the paper should describe the architecture clearly and fully.
  - (c) If the contribution is a new model (e.g., a large language model), then there should either be a way to access this model for reproducing the results or a way to reproduce the model (e.g., with an open-source dataset or instructions for how to construct the dataset).
  - (d) We recognize that reproducibility may be tricky in some cases, in which case authors are welcome to describe the particular way they provide for reproducibility. In the case of closed-source models, it may be that access to the model is limited in some way (e.g., to registered users), but it should be possible for other researchers to have some path to reproducing or verifying the results.

## 5. Open access to data and code

Question: Does the paper provide open access to the data and code, with sufficient instructions to faithfully reproduce the main experimental results, as described in supplemental material?

Answer: [Yes]

Justification: Yes, supplementary materials include the code and the environment needed to set up to faithfully reproduce our main results.

Guidelines:

- The answer NA means that paper does not include experiments requiring code.
- Please see the NeurIPS code and data submission guidelines (<https://nips.cc/public/guides/CodeSubmissionPolicy>) for more details.
- While we encourage the release of code and data, we understand that this might not be possible, so “No” is an acceptable answer. Papers cannot be rejected simply for not including code, unless this is central to the contribution (e.g., for a new open-source benchmark).
- The instructions should contain the exact command and environment needed to run to reproduce the results. See the NeurIPS code and data submission guidelines (<https://nips.cc/public/guides/CodeSubmissionPolicy>) for more details.
- The authors should provide instructions on data access and preparation, including how to access the raw data, preprocessed data, intermediate data, and generated data, etc.
- The authors should provide scripts to reproduce all experimental results for the new proposed method and baselines. If only a subset of experiments are reproducible, they should state which ones are omitted from the script and why.
- At submission time, to preserve anonymity, the authors should release anonymized versions (if applicable).

- Providing as much information as possible in supplemental material (appended to the paper) is recommended, but including URLs to data and code is permitted.

## 6. Experimental setting/details

Question: Does the paper specify all the training and test details (e.g., data splits, hyper-parameters, how they were chosen, type of optimizer, etc.) necessary to understand the results?

Answer: [Yes]

Justification: Yes, Appendix discusses all the implementation details.

Guidelines:

- The answer NA means that the paper does not include experiments.
- The experimental setting should be presented in the core of the paper to a level of detail that is necessary to appreciate the results and make sense of them.
- The full details can be provided either with the code, in appendix, or as supplemental material.

## 7. Experiment statistical significance

Question: Does the paper report error bars suitably and correctly defined or other appropriate information about the statistical significance of the experiments?

Answer: [NA]

Justification: All the evaluations done in the paper are deterministic.

Guidelines:

- The answer NA means that the paper does not include experiments.
- The authors should answer "Yes" if the results are accompanied by error bars, confidence intervals, or statistical significance tests, at least for the experiments that support the main claims of the paper.
- The factors of variability that the error bars are capturing should be clearly stated (for example, train/test split, initialization, random drawing of some parameter, or overall run with given experimental conditions).
- The method for calculating the error bars should be explained (closed form formula, call to a library function, bootstrap, etc.)
- The assumptions made should be given (e.g., Normally distributed errors).
- It should be clear whether the error bar is the standard deviation or the standard error of the mean.
- It is OK to report 1-sigma error bars, but one should state it. The authors should preferably report a 2-sigma error bar than state that they have a 96% CI, if the hypothesis of Normality of errors is not verified.
- For asymmetric distributions, the authors should be careful not to show in tables or figures symmetric error bars that would yield results that are out of range (e.g. negative error rates).
- If error bars are reported in tables or plots, The authors should explain in the text how they were calculated and reference the corresponding figures or tables in the text.

## 8. Experiments compute resources

Question: For each experiment, does the paper provide sufficient information on the computer resources (type of compute workers, memory, time of execution) needed to reproduce the experiments?

Answer: [Yes]

Justification: Yes, Appendix provides information on the computational resources required to reproduce the results.

Guidelines:

- The answer NA means that the paper does not include experiments.
- The paper should indicate the type of compute workers CPU or GPU, internal cluster, or cloud provider, including relevant memory and storage.

- The paper should provide the amount of compute required for each of the individual experimental runs as well as estimate the total compute.
- The paper should disclose whether the full research project required more compute than the experiments reported in the paper (e.g., preliminary or failed experiments that didn't make it into the paper).

## 9. Code of ethics

Question: Does the research conducted in the paper conform, in every respect, with the NeurIPS Code of Ethics <https://neurips.cc/public/EthicsGuidelines?>

Answer: [Yes]

Justification: Yes, research conducted in the paper conform with the NeurIPS Code of Ethics.

Guidelines:

- The answer NA means that the authors have not reviewed the NeurIPS Code of Ethics.
- If the authors answer No, they should explain the special circumstances that require a deviation from the Code of Ethics.
- The authors should make sure to preserve anonymity (e.g., if there is a special consideration due to laws or regulations in their jurisdiction).

## 10. Broader impacts

Question: Does the paper discuss both potential positive societal impacts and negative societal impacts of the work performed?

Answer: [NA]

Justification: This paper does not include any immediate societal impact.

Guidelines:

- The answer NA means that there is no societal impact of the work performed.
- If the authors answer NA or No, they should explain why their work has no societal impact or why the paper does not address societal impact.
- Examples of negative societal impacts include potential malicious or unintended uses (e.g., disinformation, generating fake profiles, surveillance), fairness considerations (e.g., deployment of technologies that could make decisions that unfairly impact specific groups), privacy considerations, and security considerations.
- The conference expects that many papers will be foundational research and not tied to particular applications, let alone deployments. However, if there is a direct path to any negative applications, the authors should point it out. For example, it is legitimate to point out that an improvement in the quality of generative models could be used to generate deepfakes for disinformation. On the other hand, it is not needed to point out that a generic algorithm for optimizing neural networks could enable people to train models that generate Deepfakes faster.
- The authors should consider possible harms that could arise when the technology is being used as intended and functioning correctly, harms that could arise when the technology is being used as intended but gives incorrect results, and harms following from (intentional or unintentional) misuse of the technology.
- If there are negative societal impacts, the authors could also discuss possible mitigation strategies (e.g., gated release of models, providing defenses in addition to attacks, mechanisms for monitoring misuse, mechanisms to monitor how a system learns from feedback over time, improving the efficiency and accessibility of ML).

## 11. Safeguards

Question: Does the paper describe safeguards that have been put in place for responsible release of data or models that have a high risk for misuse (e.g., pretrained language models, image generators, or scraped datasets)?

Answer: [NA]

Justification: This paper does not have a misuse risk.

Guidelines:

- The answer NA means that the paper poses no such risks.
- Released models that have a high risk for misuse or dual-use should be released with necessary safeguards to allow for controlled use of the model, for example by requiring that users adhere to usage guidelines or restrictions to access the model or implementing safety filters.
- Datasets that have been scraped from the Internet could pose safety risks. The authors should describe how they avoided releasing unsafe images.
- We recognize that providing effective safeguards is challenging, and many papers do not require this, but we encourage authors to take this into account and make a best faith effort.

## 12. Licenses for existing assets

Question: Are the creators or original owners of assets (e.g., code, data, models), used in the paper, properly credited and are the license and terms of use explicitly mentioned and properly respected?

Answer: [Yes]

Justification: Yes, Appendix includes details about used assets.

Guidelines:

- The answer NA means that the paper does not use existing assets.
- The authors should cite the original paper that produced the code package or dataset.
- The authors should state which version of the asset is used and, if possible, include a URL.
- The name of the license (e.g., CC-BY 4.0) should be included for each asset.
- For scraped data from a particular source (e.g., website), the copyright and terms of service of that source should be provided.
- If assets are released, the license, copyright information, and terms of use in the package should be provided. For popular datasets, [paperswithcode.com/datasets](https://paperswithcode.com/datasets) has curated licenses for some datasets. Their licensing guide can help determine the license of a dataset.
- For existing datasets that are re-packaged, both the original license and the license of the derived asset (if it has changed) should be provided.
- If this information is not available online, the authors are encouraged to reach out to the asset's creators.

## 13. New assets

Question: Are new assets introduced in the paper well documented and is the documentation provided alongside the assets?

Answer: [NA]

Justification: The paper does not release new assets.

Guidelines:

- The answer NA means that the paper does not release new assets.
- Researchers should communicate the details of the dataset/code/model as part of their submissions via structured templates. This includes details about training, license, limitations, etc.
- The paper should discuss whether and how consent was obtained from people whose asset is used.
- At submission time, remember to anonymize your assets (if applicable). You can either create an anonymized URL or include an anonymized zip file.

## 14. Crowdsourcing and research with human subjects

Question: For crowdsourcing experiments and research with human subjects, does the paper include the full text of instructions given to participants and screenshots, if applicable, as well as details about compensation (if any)?

Answer: [NA]

982 Justification: The paper does not involve crowdsourcing nor research with human subjects.

983 Guidelines:

- 984 • The answer NA means that the paper does not involve crowdsourcing nor research with
- 985 human subjects.
- 986 • Including this information in the supplemental material is fine, but if the main contribu-
- 987 tion of the paper involves human subjects, then as much detail as possible should be
- 988 included in the main paper.
- 989 • According to the NeurIPS Code of Ethics, workers involved in data collection, curation,
- 990 or other labor should be paid at least the minimum wage in the country of the data
- 991 collector.

992 **15. Institutional review board (IRB) approvals or equivalent for research with human**

993 **subjects**

994 Question: Does the paper describe potential risks incurred by study participants, whether

995 such risks were disclosed to the subjects, and whether Institutional Review Board (IRB)

996 approvals (or an equivalent approval/review based on the requirements of your country or

997 institution) were obtained?

998 Answer: [NA]

999 Justification: The paper does not involve crowdsourcing nor research with human subjects.

1000 Guidelines:

- 1001 • The answer NA means that the paper does not involve crowdsourcing nor research with
- 1002 human subjects.
- 1003 • Depending on the country in which research is conducted, IRB approval (or equivalent)
- 1004 may be required for any human subjects research. If you obtained IRB approval, you
- 1005 should clearly state this in the paper.
- 1006 • We recognize that the procedures for this may vary significantly between institutions
- 1007 and locations, and we expect authors to adhere to the NeurIPS Code of Ethics and the
- 1008 guidelines for their institution.
- 1009 • For initial submissions, do not include any information that would break anonymity (if
- 1010 applicable), such as the institution conducting the review.

1011 **16. Declaration of LLM usage**

1012 Question: Does the paper describe the usage of LLMs if it is an important, original, or

1013 non-standard component of the core methods in this research? Note that if the LLM is used

1014 only for writing, editing, or formatting purposes and does not impact the core methodology,

1015 scientific rigorousness, or originality of the research, declaration is not required.

1016 Answer: [NA]

1017 Justification: The paper does not involve LLMs as any important, original, or non-standard

1018 components.

1019 Guidelines:

- 1020 • The answer NA means that the core method development in this research does not
- 1021 involve LLMs as any important, original, or non-standard components.
- 1022 • Please refer to our LLM policy (<https://neurips.cc/Conferences/2025/LLM>)
- 1023 for what should or should not be described.
